# Supplementary material for: In situ studies of reversible solid–gas reactions of ethylene responsive silver pyrazolates
Source: Royal Society of Chemistry journal article supplement (doi:10.1039/d3sc04182d), 2023-11-29
Supplement: d3sc04182d1.pdf [file d3sc04182d1.pdf]

## **Supporting Materials**

### ***In situ* studies of reversible solid-gas reactions of ethylene responsive silver pyrazolates**

H. V. Rasika Dias,<sup>1,\*</sup> Devaborniny Parasar,<sup>1</sup> Andrey A. Yakovenko,<sup>2,\*</sup> Peter W. Stephens,<sup>3,\*</sup> Álvaro R. Muñoz-Castro,<sup>4,\*</sup> Mukundam Vanga,<sup>1</sup> Pavel Mykhailiuk,<sup>5,6</sup> Evgeniy Slobodyanyuk<sup>5</sup>

[1] Department of Chemistry and Biochemistry, The University of Texas at Arlington, Arlington, Texas 76019, USA; [2] X-Ray Science Division, Advanced Photon Source, Argonne National Laboratory, Argonne, Illinois 60439, USA; [3] Department of Physics and Astronomy, Stony Brook University, Stony Brook, NY 11794-3800, USA; [4] Facultad de Ingeniería, Arquitectura y Diseño, Universidad San Sebastián, Bellavista 7, Santiago, 8420524, Chile; [5] Enamine Ltd., Chervonotkatska 78, 02094 Kyiv, Ukraine; [6] Taras Shevchenko National University of Kyiv, Faculty of Chemistry; Volodymyrska 60, 01601 Kyiv, Ukraine

## Synthesis and characterization of {[3,4,5-(CF<sub>3</sub>)<sub>3</sub>Pz]Ag}<sub>3</sub> ([Ag-CF<sub>3</sub>]<sub>3</sub>) and {[3,4,5-(CF<sub>3</sub>)<sub>3</sub>Pz]Ag(C<sub>2</sub>H<sub>4</sub>)<sub>2</sub>}<sub>2</sub> ([Ag-CF<sub>3</sub>•(C<sub>2</sub>H<sub>4</sub>)]<sub>2</sub>)

### General Information

All manipulations were carried out under an atmosphere of purified nitrogen using standard Schlenk techniques or in a MBraun glovebox equipped with a -25 °C refrigerator. Solvents were purchased from commercial sources and purified before use. NMR spectra were recorded at 25 °C on a JEOL Eclipse 500 spectrometer (<sup>1</sup>H, 500.16 MHz <sup>13</sup>C, 125.78 MHz, and <sup>19</sup>F, 470.62 MHz) unless otherwise noted. <sup>1</sup>H and <sup>13</sup>C NMR spectra are referenced to the solvent peak (<sup>1</sup>H; CDCl<sub>3</sub> δ 7.26, <sup>13</sup>C; CDCl<sub>3</sub> δ 77.16). <sup>1</sup>H NMR coupling constants (J) are reported in Hertz (Hz) and multiplicities are indicated as follows: s (singlet), d (doublet), t (triplet), m (multiplet). <sup>19</sup>F NMR values were referenced to external CFCl<sub>3</sub>. Melting points were obtained on a Mel-Temp II apparatus and were not corrected. Elemental analyses were performed using a Perkin-Elmer Model 2400 CHN analyzer. IR spectra were collected at room temperature on a Shimadzu IR Prestige-21 FTIR containing an ATR attachment using pure liquid or solid materials, with instrument resolution at 2 cm<sup>-1</sup>. Raman data were collected on a Horiba Jobin Yvon LabRAM Aramin Raman spectrometer with a HeNe laser source of 633 nm, by placing pure solid materials on a glass slide. All other reactants and reagents were purchased from commercial sources. Heating was accomplished by either a heating mantle or a silicone oil bath. The 3,4,5-(CF<sub>3</sub>)<sub>3</sub>PzH<sup>[1]</sup> was prepared via reported methods.

## Synthesis of {[3,4,5-(CF<sub>3</sub>)<sub>3</sub>Pz]Ag}<sub>3</sub> ([Ag-CF<sub>3</sub>]<sub>3</sub>)

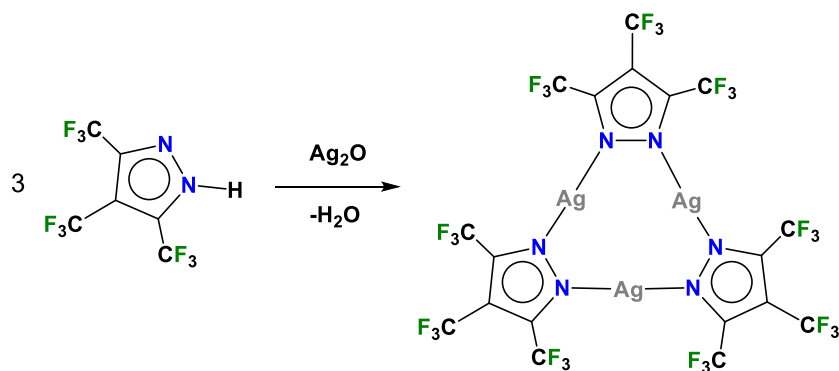

Freshly dried 3,4,5-(CF<sub>3</sub>)<sub>3</sub>PzH (300 mg, 1.10 mmol) and Ag<sub>2</sub>O (211 mg, 0.91 mmol) were placed in a Schlenk flask attached to a reflux condenser, slowly heated to 125-130 °C and kept for 4 h while stirring, or until unreacted pyrazole stops condensing on the walls the flask. A heat gun was used to meltdown the pyrazole condensed on the wall of the Schlenk flask, as needed. Excess 3,4,5-(CF<sub>3</sub>)<sub>3</sub>PzH was sublimated off, the product was extracted into dichloromethane, and filtered through a bed of Celite. The filtrate was collected, and solvent was removed under reduced pressure to obtain {[3,4,5-(CF<sub>3</sub>)<sub>3</sub>Pz]Ag}<sub>3</sub> ([Ag-CF<sub>3</sub>]<sub>3</sub>) as a white powder. X-ray quality crystals were grown from dichloromethane at -20 °C. Yield: 91%. M.p.: 260 °C. Anal. Calc. for C<sub>18</sub>N<sub>6</sub>F<sub>27</sub>Ag<sub>3</sub>: C, 19.02; H, 0.00; N, 7.39. Found: C, 18.98; H, <0.1; N, 7.41. <sup>19</sup>F NMR (in CDCl<sub>3</sub>): δ (ppm) -54.94 (br s), -60.63 (q, 7.2 Hz). <sup>13</sup>C{<sup>1</sup>H} NMR (in CDCl<sub>3</sub>): δ (ppm) 110.6 (q, <sup>2</sup>J(C,F) = 42.0 Hz, CCF<sub>3</sub>), 119.2 (q, <sup>1</sup>J(C,F) = 270.3 Hz, CF<sub>3</sub>), 120.7 (q, <sup>1</sup>J(C,F) = 262.7 Hz, CF<sub>3</sub>), 143.5 (q, <sup>2</sup>J(C,F) = 36.0 Hz, CCF<sub>3</sub>). Raman (cm<sup>-1</sup>): 3148, 1594, 1536, 1502, 1453, 1349, 1154, 1088, 1000, 985, 845.

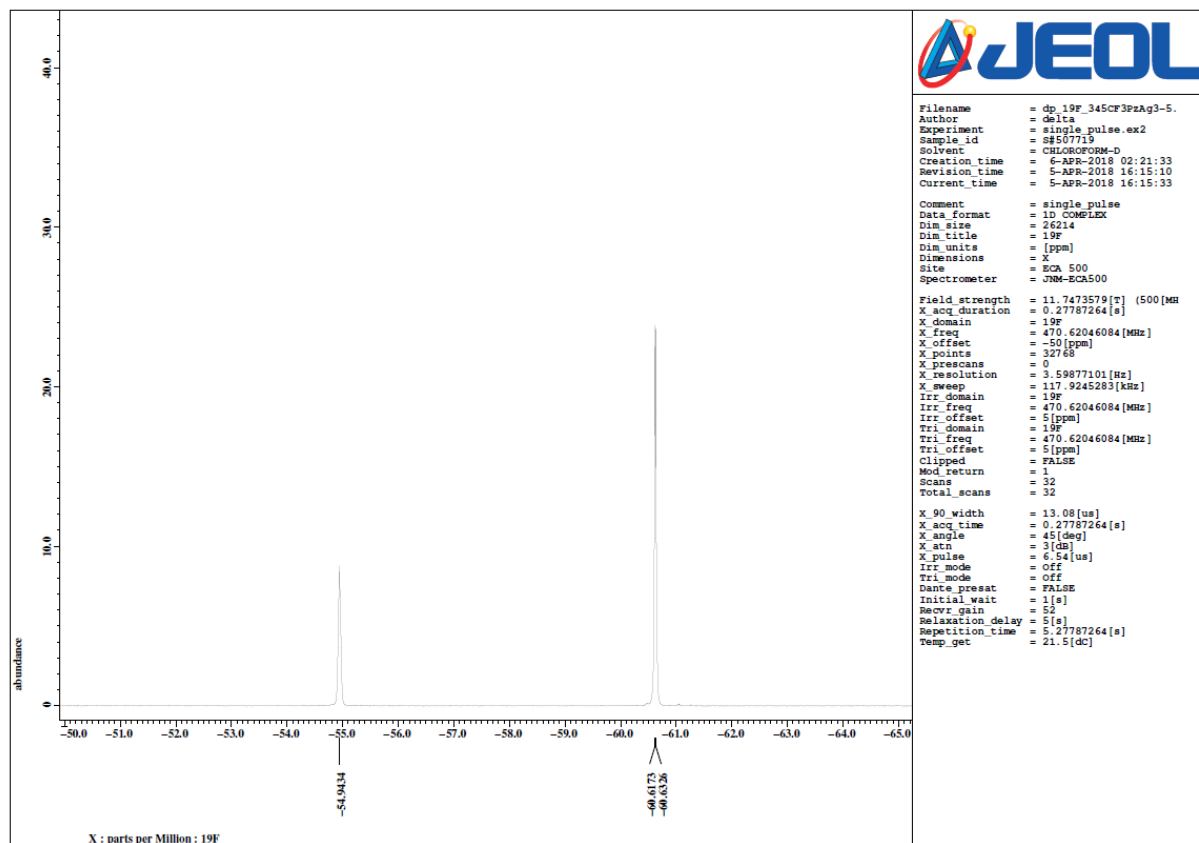

**Figure S1.**  $^{19}\text{F}$  NMR spectrum of  $\{[3,4,5-(\text{CF}_3)_3\text{Pz}]\text{Ag}\}_3$  in  $\text{CDCl}_3$  at the room temperature.

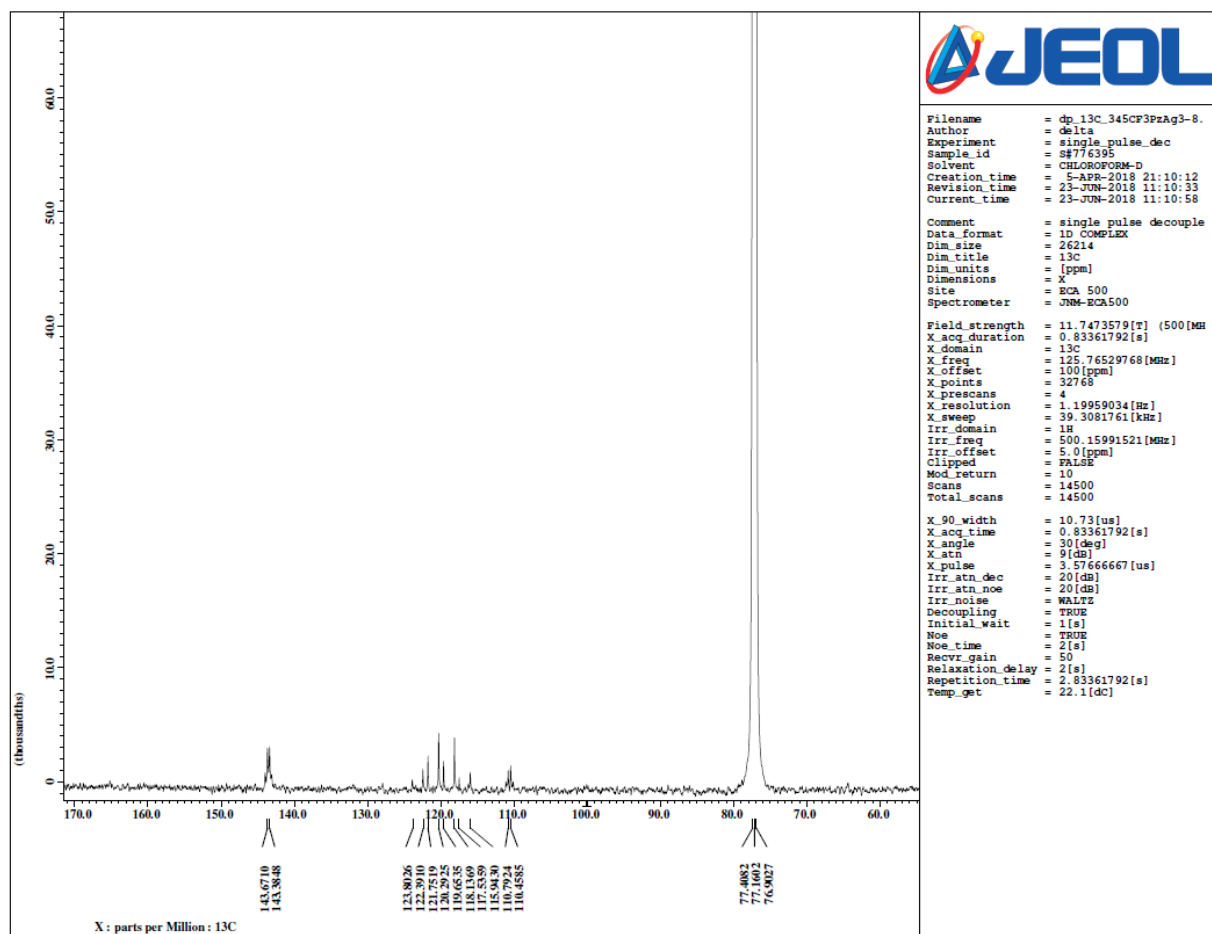

**Figure S2.**  $^{13}\text{C}\{^1\text{H}\}$  NMR spectrum of  $\{[3,4,5-(\text{CF}_3)_3\text{Pz}]\text{Ag}\}_3$  in  $\text{CDCl}_3$  at the room temperature.

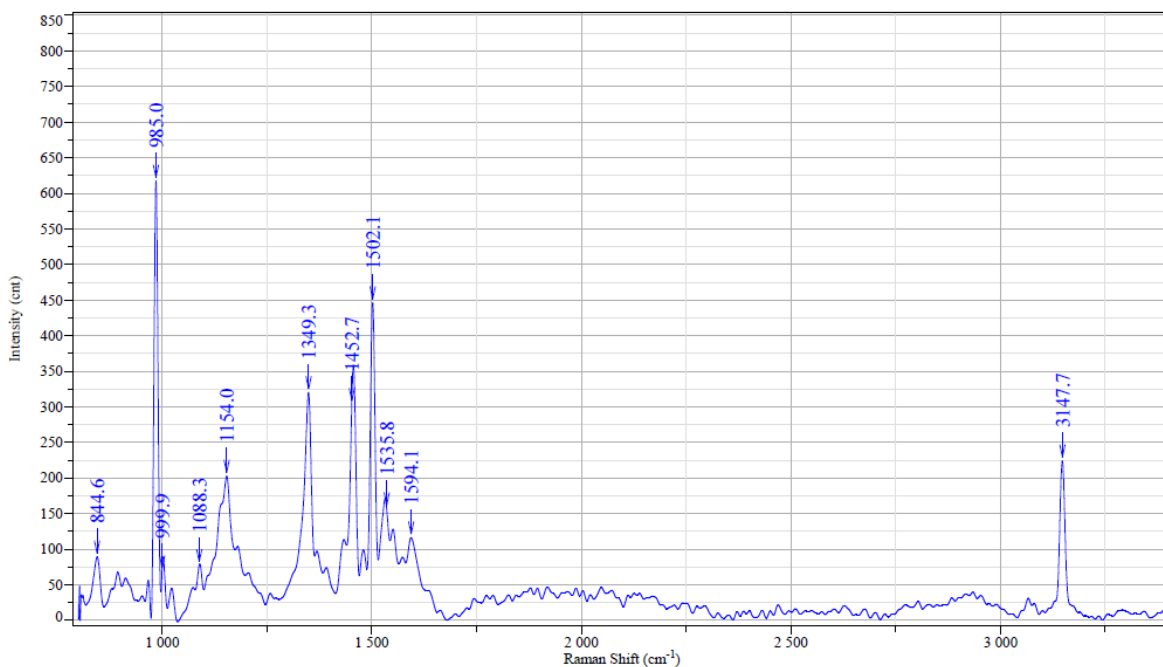

|              |         |          |         |
|--------------|---------|----------|---------|
| Exposition   | 5       | Slit     | 100     |
| Accumulation | 5 x 4   | Operator | Parasar |
| Laser        | 632.817 | Sample   | Ag3     |
| Spectro      | Multi   | Remark   |         |
| Hole         | 200     | Power    |         |

**HORIBA**JOBIN YVON

**Figure S3.** Raman spectrum of {[3,4,5-(CF<sub>3</sub>)<sub>3</sub>Pz]Ag}<sub>3</sub>

## Synthesis of $\{[3,4,5-(\text{CF}_3)_3\text{Pz}]\text{Ag}(\text{C}_2\text{H}_4)\}_2$

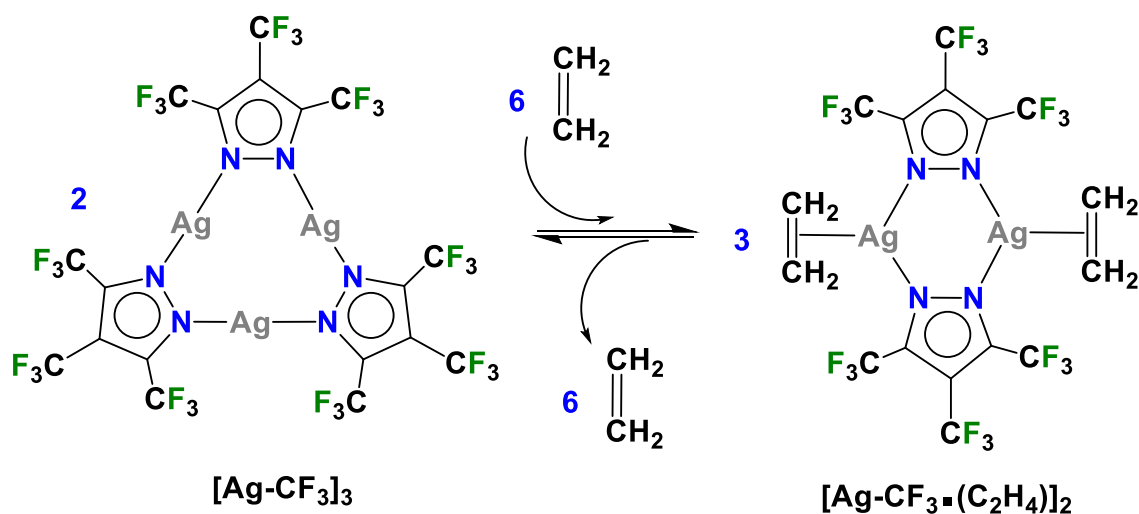

$\{[3,4,5-(\text{CF}_3)_3\text{Pz}]\text{Ag}\}_3$  (200 mg, 0.18 mmol) was dissolved in 10-12 mL of  $\text{CH}_2\text{Cl}_2$ , ethylene was bubbled for ~10 min. The ethylene saturated solution was kept at  $-25^\circ\text{C}$  to obtain X-ray quality colorless crystals of  $\{[3,4,5-(\text{CF}_3)_3\text{Pz}]\text{Ag}(\text{C}_2\text{H}_4)\}_2$  ( $[\text{Ag}-\text{CF}_3\bullet(\text{C}_2\text{H}_4)]_2$ ). Yield: 96%.  $^{19}\text{F}$  NMR (in  $\text{CDCl}_3$  at  $-50^\circ\text{C}$ ):  $\delta$  (ppm) -60.00 (3,5- $\text{CF}_3$ ) and -54.97 (4- $\text{CF}_3$ ).  $^1\text{H}$  NMR (in  $\text{CDCl}_3$  at  $-50^\circ\text{C}$ ):  $\delta$  (ppm) 5.42.

## NMR Studies of solution-state equilibria for the $[\text{Ag-CF}_3\bullet(\text{C}_2\text{H}_4)]_2$ reaction with ethylene

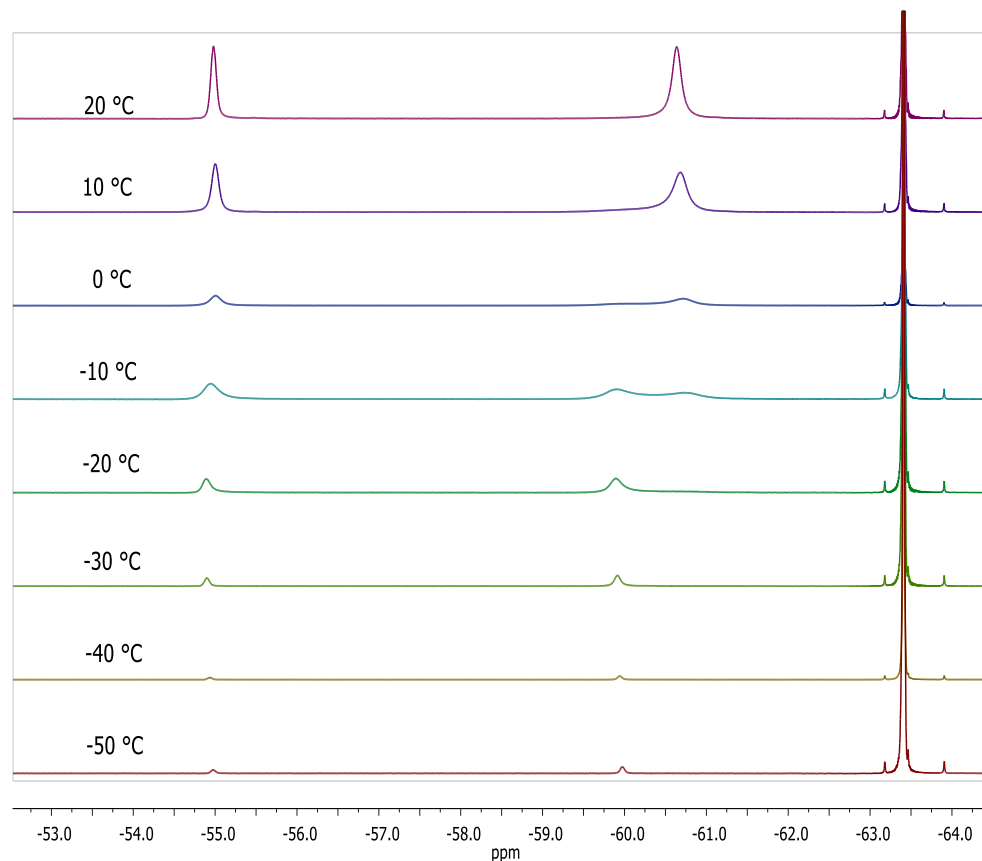

**Figure S4.**  $^{19}\text{F}$  NMR spectra of  $[\text{Ag-CF}_3\bullet(\text{C}_2\text{H}_4)]_2/[\text{Ag-CF}_3]_3/\text{ethylene}$  at various temperatures. (Referenced to internal standard at constant value, 1,3,5- $(\text{CF}_3)_3\text{C}_6\text{H}_3$  was used as the internal standard (-63.41 ppm)). The data were collected using crystalline  $[\text{Ag-CF}_3\bullet(\text{C}_2\text{H}_4)]_2$ .

As evident from these spectra, at 20 °C in  $\text{CDCl}_3$ ,  $[\text{Ag-CF}_3\bullet(\text{C}_2\text{H}_4)]_2$  completely dissociates into  $[\text{Ag-CF}_3]_3$  and free ethylene. Therefore,  $^{19}\text{F}$  NMR peaks corresponding to  $[\text{Ag-CF}_3]_3$  species can be observed at 20 °C (-60.64 and -54.98 for 3,5- $\text{CF}_3$  and 4- $\text{CF}_3$ , respectively).

From 0 °C to -20 °C signals for both  $[\text{Ag-CF}_3\bullet(\text{C}_2\text{H}_4)]_2$  and  $[\text{Ag-CF}_3]_3$  was observed in various ratios.

From -30 °C to -50 °C only signals corresponding to  $[\text{Ag-CF}_3\bullet(\text{C}_2\text{H}_4)]_2$  is observed (-60.00 and -54.97 ppm corresponding to 3,5- $\text{CF}_3$  and 4- $\text{CF}_3$  groups, respectively).



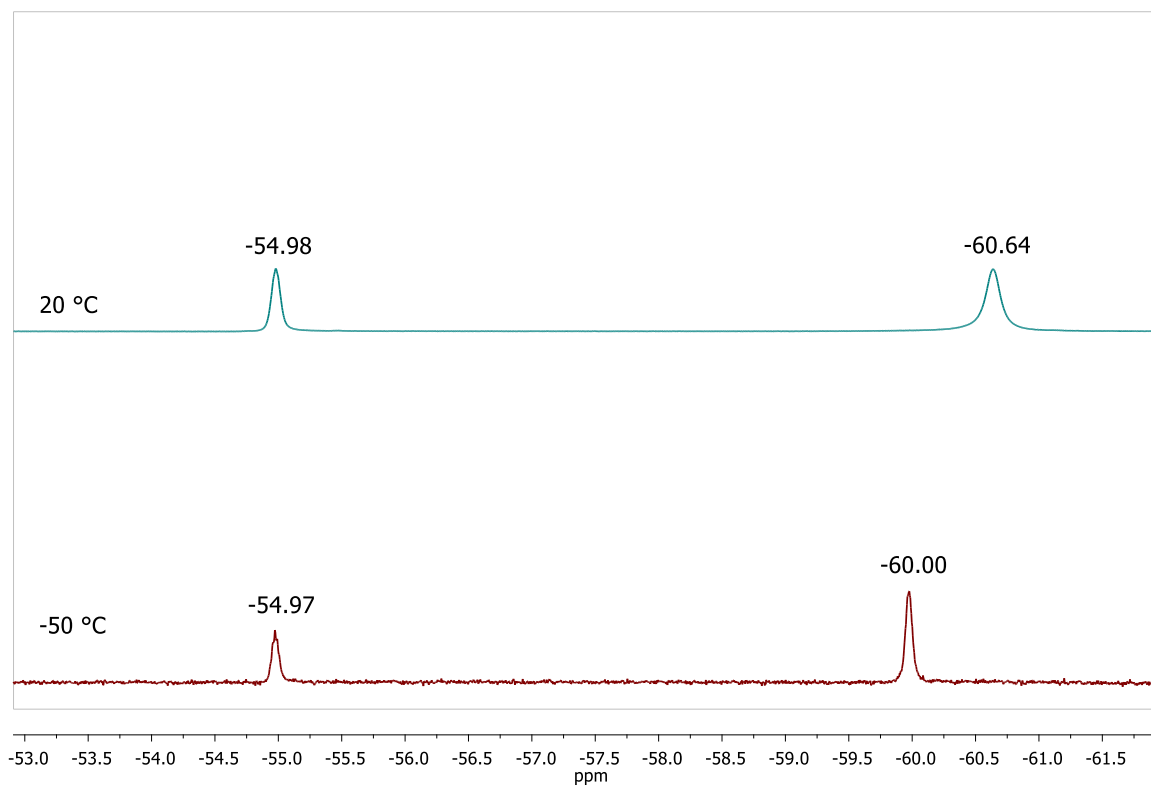

**Figure S5.** Another view  $^{19}\text{F}$  NMR spectra of  $[\text{Ag-CF}_3\bullet(\text{C}_2\text{H}_4)]_2/[\text{Ag-CF}_3]_3/\text{ethylene}$  mixture at 20 °C (exclusively  $[\text{Ag-CF}_3]_3$  and free ethylene) and -50 °C ( $[\text{Ag-CF}_3\bullet(\text{C}_2\text{H}_4)]_2$ ).

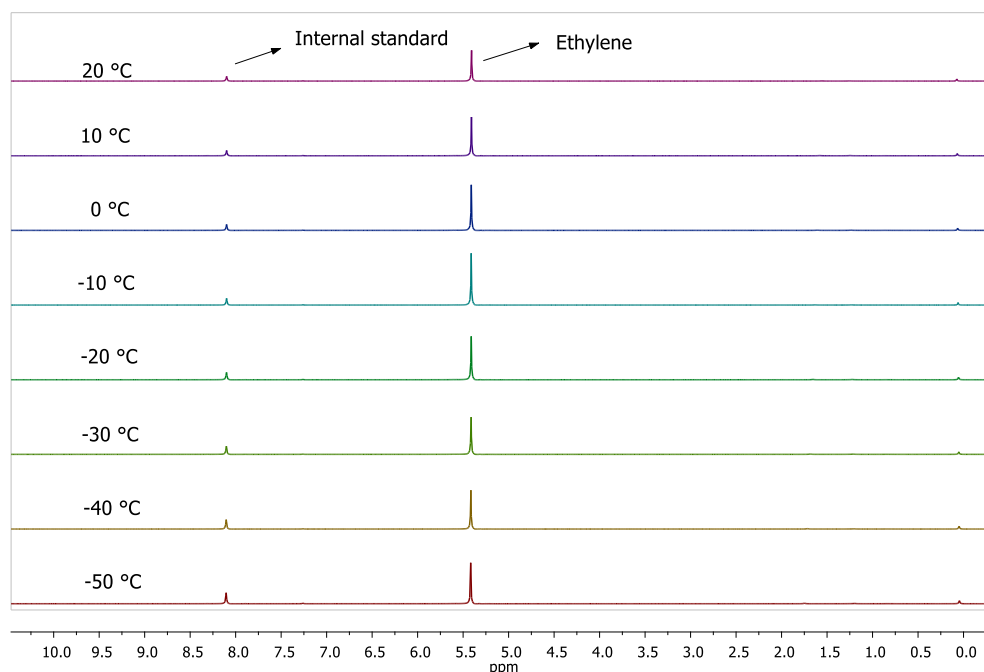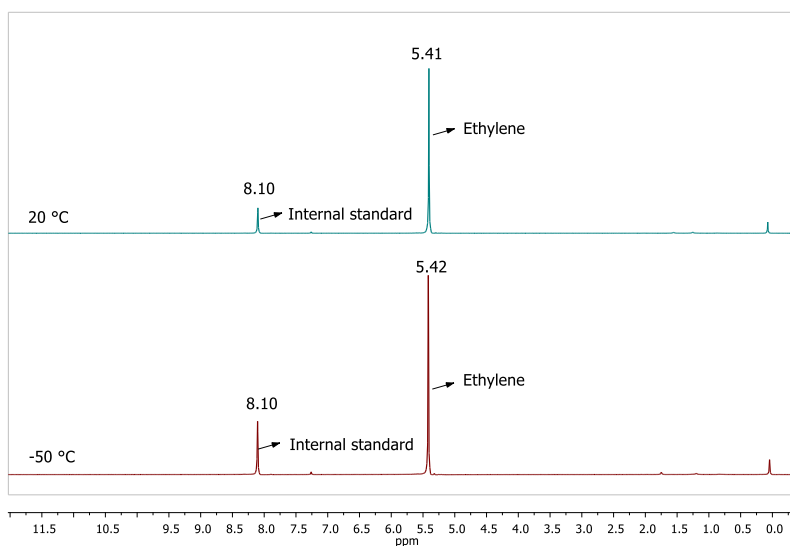

**Figure S6;**  $^1\text{H}$  NMR spectra (two views) of NMR spectra of  $[\text{Ag-CF}_3\bullet(\text{C}_2\text{H}_4)]_2/[\text{Ag-CF}_3]_3/\text{ethylene}$  at various temperatures.

No clear shift is observable perhaps due to highly fluxional Ag-ethylene interaction although the  $^{19}\text{F}$  NMR data indicated the formation of  $[\text{Ag-CF}_3\bullet(\text{C}_2\text{H}_4)]_2$  from  $[\text{Ag-CF}_3]_3/\text{ethylene}$  when the temperature is lower than  $-10\text{ }^\circ\text{C}$ .

## Single crystal X-ray crystallography.

A suitable crystal covered with a layer of hydrocarbon/Paratone-N oil was selected and mounted on a Cryo-loop, and immediately placed in the low-temperature nitrogen stream. The X-ray intensity data were measured at 100(2) K on a Bruker D8 Quest with a Photon 100 CMOS detector equipped with an Oxford Cryosystems 700 series cooler, a graphite monochromator, and a Mo K $\alpha$  fine-focus sealed tube ( $\lambda = 0.71073$  Å). Intensity data were processed using the Bruker Apex program suite. Absorption corrections were applied by using SADABS.<sup>[2]</sup> Initial atomic positions were located by SHELXT,<sup>[3]</sup> and the structures of the compounds were refined by the least-squares method using SHELXL<sup>[4]</sup> within Olex2 GUI.<sup>[5]</sup> All the non-hydrogen atoms were refined anisotropically. There are two molecules of **[Ag-CF<sub>3</sub>•(C<sub>2</sub>H<sub>4</sub>)]<sub>2</sub>** in the asymmetric unit. It was solved and refined in Pna2<sub>1</sub> space group as an inversion twin. We have also tested the possibility of Pccn space group for **[Ag-CF<sub>3</sub>•(C<sub>2</sub>H<sub>4</sub>)]<sub>2</sub>** suggested by the CheckCif but the refinement indicators were significantly poor. The hydrogen atoms of the ethylene groups of **[Ag-CF<sub>3</sub>•(C<sub>2</sub>H<sub>4</sub>)]<sub>2</sub>** were located using difference Fourier maps, included, and refined freely with isotropic displacement parameters. The hydrogen atoms of **[Ag-CF<sub>3</sub>]<sub>3</sub>•CH<sub>2</sub>Cl<sub>2</sub>** were included in their calculated positions and refined as riding on the atoms to which they are joined. X-ray structural figures were generated using Olex2.<sup>[5]</sup> The **CCDC** 2256899-2256900 files contain the supplementary crystallographic data for **[Ag-CF<sub>3</sub>]<sub>3</sub>•CH<sub>2</sub>Cl<sub>2</sub>** and **[Ag-CF<sub>3</sub>•(C<sub>2</sub>H<sub>4</sub>)]<sub>2</sub>**. These data can be obtained free of charge via <http://www.ccdc.cam.ac.uk/conts/retrieving.html> or from the Cambridge Crystallographic Data Centre (CCDC), 12 Union Road, Cambridge, CB2 1EZ, UK).

## Single crystal X-ray crystallography of $[\text{Ag-CF}_3]_3 \bullet \text{CH}_2\text{Cl}_2$

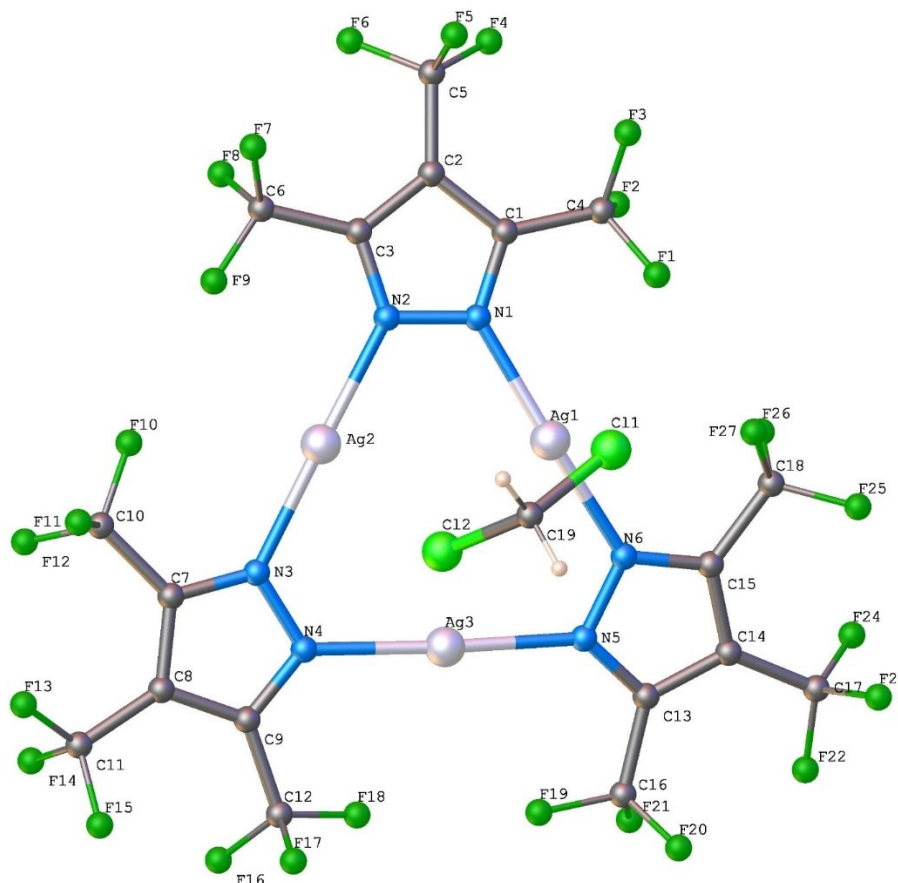

**Figure S7.** Molecular structure and atom labelling scheme of  $[\text{Ag-CF}_3]_3 \bullet \text{CH}_2\text{Cl}_2$

The analysis of the crystal of  $[\text{Ag-CF}_3]_3$  obtained from dichloromethane by single crystal X-ray diffraction show that it crystallizes as  $[\text{Ag-CF}_3]_3 \bullet \text{CH}_2\text{Cl}_2$  from dichloromethane in  $P\bar{1}$  space group with chlorine atoms facing silver sites (Figure S8), with Ag-Cl contacts shorter than the van der Waals contact separation of Ag and Cl (3.47 Å). This suggest that the silver sites are quite Lewis acidic even to interact with weakly donating  $\text{CH}_2\text{Cl}_2$  which is not surprising considering the number of electron-withdrawing fluorinated substituents on the ligand backbone. The solvent molecules in the crystal lattice, however, can be removed easily under reduced pressure to obtain  $[\text{Ag-CF}_3]_3$ , of which structure was confirmed by analyzing the material using powder X-ray diffraction (Figure S14 below).

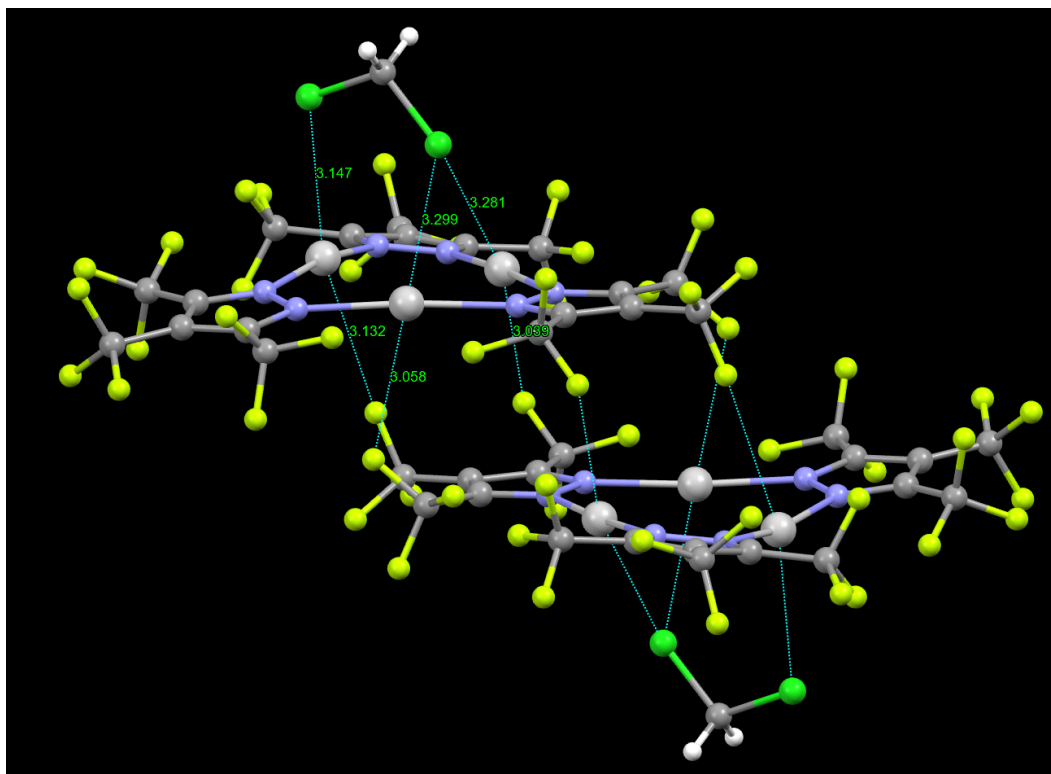

**Figure S8.** Single crystal X-ray structure of  $[\text{Ag}-\text{CF}_3]_3 \cdot \text{CH}_2\text{Cl}_2$  showing Ag...Cl and Ag...F interactions.

**Table S1.** Crystal data and structure refinement for **[Ag-CF<sub>3</sub>]<sub>3</sub>•CH<sub>2</sub>Cl<sub>2</sub>**.

|                                             |                                                                                               |
|---------------------------------------------|-----------------------------------------------------------------------------------------------|
| Identification code                         | Rad629                                                                                        |
| Empirical formula                           | C <sub>19</sub> H <sub>2</sub> Ag <sub>3</sub> Cl <sub>2</sub> F <sub>27</sub> N <sub>6</sub> |
| Formula weight                              | 1221.78                                                                                       |
| Temperature/K                               | 100                                                                                           |
| Crystal system                              | triclinic                                                                                     |
| Space group                                 | P-1                                                                                           |
| a/Å                                         | 9.4750(8)                                                                                     |
| b/Å                                         | 10.5097(9)                                                                                    |
| c/Å                                         | 18.0959(16)                                                                                   |
| α/°                                         | 95.547(2)                                                                                     |
| β/°                                         | 98.944(2)                                                                                     |
| γ/°                                         | 116.476(2)                                                                                    |
| Volume/Å <sup>3</sup>                       | 1565.1(2)                                                                                     |
| Z                                           | 2                                                                                             |
| ρ <sub>calc</sub> /g/cm <sup>3</sup>        | 2.593                                                                                         |
| μ/mm <sup>-1</sup>                          | 2.219                                                                                         |
| F(000)                                      | 1152.0                                                                                        |
| Crystal size/mm <sup>3</sup>                | 0.38 × 0.28 × 0.07                                                                            |
| Radiation                                   | MoKα (λ = 0.71073)                                                                            |
| 2θ range for data collection/°              | 5.77 to 61.012                                                                                |
| Index ranges                                | -13 ≤ h ≤ 13, -15 ≤ k ≤ 15, -25 ≤ l ≤ 25                                                      |
| Reflections collected                       | 21034                                                                                         |
| Independent reflections                     | 9480 [R <sub>int</sub> = 0.0183, R <sub>sigma</sub> = 0.0251]                                 |
| Data/restraints/parameters                  | 9480/0/515                                                                                    |
| Goodness-of-fit on F <sup>2</sup>           | 1.117                                                                                         |
| Final R indexes [I ≥ 2σ (I)]                | R <sub>1</sub> = 0.0253, wR <sub>2</sub> = 0.0626                                             |
| Final R indexes [all data]                  | R <sub>1</sub> = 0.0267, wR <sub>2</sub> = 0.0636                                             |
| Largest diff. peak/hole / e Å <sup>-3</sup> | 1.14/-1.13                                                                                    |

**Table S2.** Bond Lengths for [Ag-CF<sub>3</sub>]<sub>3</sub>•CH<sub>2</sub>Cl<sub>2</sub>.

| Atom | Atom | Length/Å   | Atom | Atom | Length/Å   |
|------|------|------------|------|------|------------|
| Ag1  | N1   | 2.1162(14) | F25  | C18  | 1.331(2)   |
| Ag1  | N6   | 2.1142(14) | F26  | C18  | 1.329(2)   |
| Ag2  | N2   | 2.1199(15) | F27  | C18  | 1.329(2)   |
| Ag2  | N3   | 2.1267(15) | N1   | N2   | 1.3574(19) |
| Ag3  | N4   | 2.1212(15) | N1   | C1   | 1.341(2)   |
| Ag3  | N5   | 2.1156(14) | N2   | C3   | 1.342(2)   |
| F1   | C4   | 1.337(2)   | N3   | N4   | 1.362(2)   |
| F2   | C4   | 1.340(2)   | N3   | C7   | 1.343(2)   |
| F3   | C4   | 1.330(2)   | N4   | C9   | 1.344(2)   |
| F4   | C5   | 1.336(2)   | N5   | N6   | 1.3584(19) |
| F5   | C5   | 1.3356(19) | N5   | C13  | 1.342(2)   |
| F6   | C5   | 1.342(2)   | N6   | C15  | 1.338(2)   |
| F7   | C6   | 1.344(2)   | C1   | C2   | 1.392(2)   |
| F8   | C6   | 1.339(2)   | C1   | C4   | 1.496(2)   |
| F9   | C6   | 1.333(2)   | C2   | C3   | 1.395(2)   |
| F10  | C10  | 1.337(2)   | C2   | C5   | 1.492(2)   |
| F11  | C10  | 1.328(2)   | C3   | C6   | 1.500(2)   |
| F12  | C10  | 1.344(2)   | C7   | C8   | 1.394(2)   |
| F13  | C11  | 1.332(2)   | C7   | C10  | 1.505(3)   |
| F14  | C11  | 1.340(2)   | C8   | C9   | 1.390(2)   |
| F15  | C11  | 1.331(2)   | C8   | C11  | 1.494(2)   |
| F16  | C12  | 1.341(2)   | C9   | C12  | 1.505(3)   |
| F17  | C12  | 1.325(2)   | C13  | C14  | 1.393(2)   |
| F18  | C12  | 1.335(2)   | C13  | C16  | 1.505(2)   |
| F19  | C16  | 1.329(2)   | C14  | C15  | 1.390(2)   |
| F20  | C16  | 1.340(2)   | C14  | C17  | 1.491(2)   |
| F21  | C16  | 1.337(2)   | C15  | C18  | 1.500(2)   |
| F22  | C17  | 1.344(2)   | Cl1  | C19  | 1.754(2)   |
| F23  | C17  | 1.330(2)   | Cl2  | C19  | 1.787(2)   |
| F24  | C17  | 1.340(2)   |      |      |            |

**Table S3.** Bond Angles for [Ag-CF<sub>3</sub>]<sub>3</sub>•CH<sub>2</sub>Cl<sub>2</sub>.

| Atom | Atom | Atom | Angle/°    | Atom | Atom | Atom | Angle/°    |
|------|------|------|------------|------|------|------|------------|
| N6   | Ag1  | N1   | 167.87(6)  | C9   | C8   | C7   | 103.73(15) |
| N2   | Ag2  | N3   | 174.98(6)  | C9   | C8   | C11  | 128.04(17) |
| N5   | Ag3  | N4   | 176.13(6)  | N4   | C9   | C8   | 110.20(16) |
| N2   | N1   | Ag1  | 120.82(11) | N4   | C9   | C12  | 120.64(16) |
| C1   | N1   | Ag1  | 131.01(11) | C8   | C9   | C12  | 129.16(15) |
| C1   | N1   | N2   | 108.15(13) | F10  | C10  | F12  | 107.25(16) |
| N1   | N2   | Ag2  | 117.70(10) | F10  | C10  | C7   | 111.73(15) |
| C3   | N2   | Ag2  | 134.15(12) | F11  | C10  | F10  | 106.96(16) |
| C3   | N2   | N1   | 108.04(14) | F11  | C10  | F12  | 107.24(15) |
| N4   | N3   | Ag2  | 121.37(11) | F11  | C10  | C7   | 112.78(15) |
| C7   | N3   | Ag2  | 130.62(13) | F12  | C10  | C7   | 110.59(15) |
| C7   | N3   | N4   | 107.91(14) | F13  | C11  | F14  | 106.87(17) |
| N3   | N4   | Ag3  | 121.83(11) | F13  | C11  | C8   | 111.95(16) |
| C9   | N4   | Ag3  | 130.08(12) | F14  | C11  | C8   | 112.21(16) |
| C9   | N4   | N3   | 108.00(14) | F15  | C11  | F13  | 106.89(17) |
| N6   | N5   | Ag3  | 117.03(10) | F15  | C11  | F14  | 106.77(17) |
| C13  | N5   | Ag3  | 135.02(11) | F15  | C11  | C8   | 111.79(16) |
| C13  | N5   | N6   | 107.95(13) | F16  | C12  | C9   | 110.84(15) |
| N5   | N6   | Ag1  | 121.96(11) | F17  | C12  | F16  | 107.16(15) |
| C15  | N6   | Ag1  | 129.82(11) | F17  | C12  | F18  | 106.77(17) |
| C15  | N6   | N5   | 108.00(13) | F17  | C12  | C9   | 112.75(15) |
| N1   | C1   | C2   | 110.12(15) | F18  | C12  | F16  | 107.33(16) |
| N1   | C1   | C4   | 120.29(15) | F18  | C12  | C9   | 111.70(15) |
| C2   | C1   | C4   | 129.52(15) | N5   | C13  | C14  | 110.14(14) |
| C1   | C2   | C3   | 103.64(14) | N5   | C13  | C16  | 120.52(15) |
| C1   | C2   | C5   | 127.81(15) | C14  | C13  | C16  | 129.29(15) |
| C3   | C2   | C5   | 128.54(15) | C13  | C14  | C17  | 129.58(15) |
| N2   | C3   | C2   | 110.06(14) | C15  | C14  | C13  | 103.53(14) |



**Table S3.** Bond Angles for [Ag-CF<sub>3</sub>]<sub>3</sub>•CH<sub>2</sub>Cl<sub>2</sub>.

| Atom | Atom | Atom | Angle/°    | Atom | Atom | Atom | Angle/°    |
|------|------|------|------------|------|------|------|------------|
| N2   | C3   | C6   | 121.05(15) | C15  | C14  | C17  | 126.89(15) |
| C2   | C3   | C6   | 128.88(15) | N6   | C15  | C14  | 110.38(14) |
| F1   | C4   | F2   | 107.07(15) | N6   | C15  | C18  | 119.51(15) |
| F1   | C4   | C1   | 111.58(14) | C14  | C15  | C18  | 130.11(15) |
| F2   | C4   | C1   | 111.29(15) | F19  | C16  | F20  | 107.70(16) |
| F3   | C4   | F1   | 107.33(15) | F19  | C16  | F21  | 106.85(15) |
| F3   | C4   | F2   | 107.16(15) | F19  | C16  | C13  | 111.58(14) |
| F3   | C4   | C1   | 112.13(14) | F20  | C16  | C13  | 111.09(15) |
| F4   | C5   | F5   | 107.24(15) | F21  | C16  | F20  | 106.93(15) |
| F4   | C5   | F6   | 106.28(14) | F21  | C16  | C13  | 112.41(15) |
| F4   | C5   | C2   | 112.11(14) | F22  | C17  | C14  | 111.13(15) |
| F5   | C5   | F6   | 106.98(14) | F23  | C17  | F22  | 107.70(16) |
| F5   | C5   | C2   | 112.78(14) | F23  | C17  | F24  | 106.77(15) |
| F6   | C5   | C2   | 111.07(14) | F23  | C17  | C14  | 113.28(15) |
| F7   | C6   | C3   | 111.00(16) | F24  | C17  | F22  | 105.89(16) |
| F8   | C6   | F7   | 107.02(15) | F24  | C17  | C14  | 111.66(14) |
| F8   | C6   | C3   | 112.56(16) | F25  | C18  | C15  | 111.94(15) |
| F9   | C6   | F7   | 107.46(17) | F26  | C18  | F25  | 108.32(17) |
| F9   | C6   | F8   | 107.02(17) | F26  | C18  | F27  | 106.97(16) |
| F9   | C6   | C3   | 111.49(15) | F26  | C18  | C15  | 111.50(15) |
| N3   | C7   | C8   | 110.16(16) | F27  | C18  | F25  | 106.13(15) |
| N3   | C7   | C10  | 120.71(16) | F27  | C18  | C15  | 111.68(15) |
| C8   | C7   | C10  | 129.11(16) | Cl1  | C19  | Cl2  | 111.67(11) |
| C7   | C8   | C11  | 128.21(17) |      |      |      |            |

## Single crystal X-ray crystallography of $[\text{Ag-CF}_3\bullet(\text{C}_2\text{H}_4)]_2$

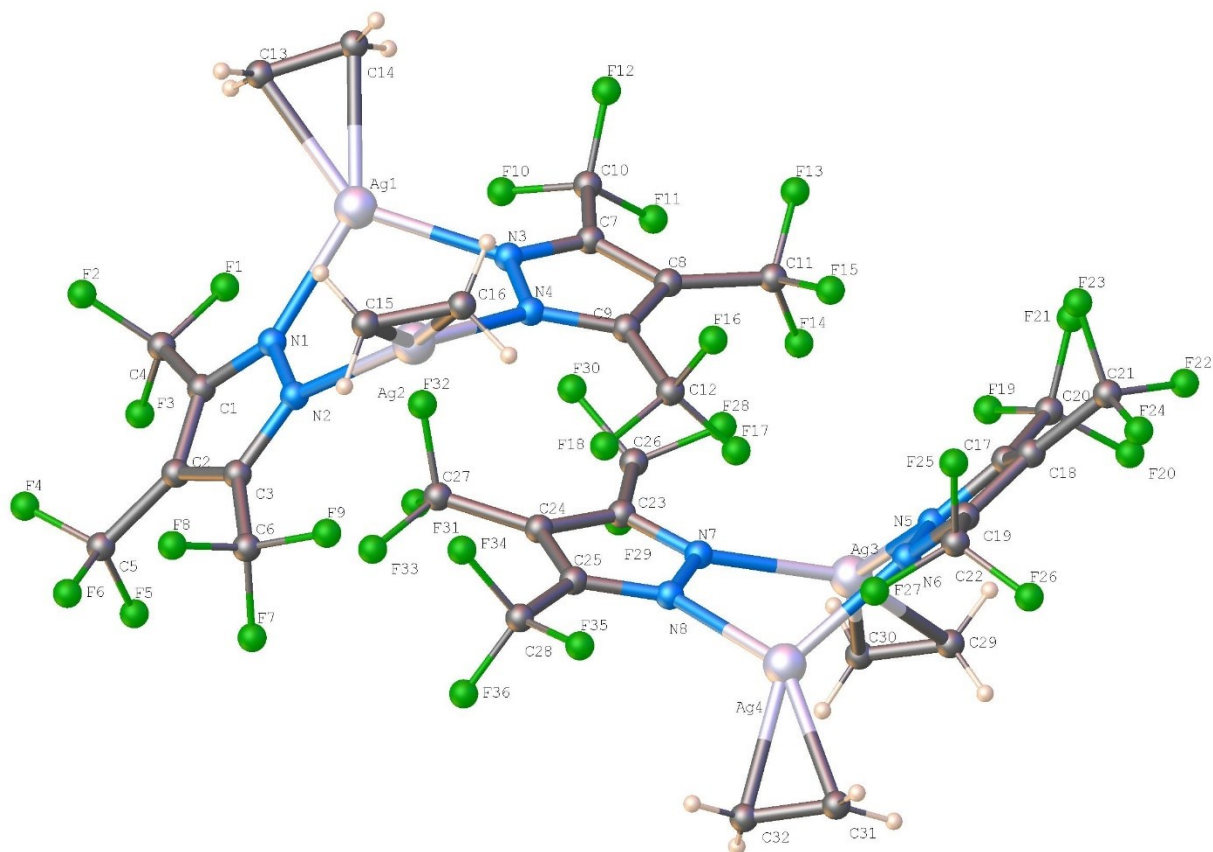

**Figure S9.** Molecular structure and atom labelling scheme of  $[\text{Ag-CF}_3\bullet(\text{C}_2\text{H}_4)]_2$ . There are two molecules in the asymmetric unit.

**Table S4.** Crystal data and structure refinement for  $[\text{Ag-CF}_3\bullet(\text{C}_2\text{H}_4)]_2$ .

|                     |                                                             |
|---------------------|-------------------------------------------------------------|
| Identification code | rad679a_b                                                   |
| Empirical formula   | $\text{C}_{16}\text{H}_8\text{Ag}_2\text{F}_{18}\text{N}_4$ |
| Formula weight      | 814.00                                                      |
| Temperature/K       | 100.0                                                       |
| Crystal system      | orthorhombic                                                |
| Space group         | $\text{Pna}2_1$                                             |
| a/Å                 | 18.4248(8)                                                  |

|                                                |                                                                |
|------------------------------------------------|----------------------------------------------------------------|
| b/Å                                            | 29.1743(13)                                                    |
| c/Å                                            | 8.8130(4)                                                      |
| $\alpha/^\circ$                                | 90                                                             |
| $\beta/^\circ$                                 | 90                                                             |
| $\gamma/^\circ$                                | 90                                                             |
| Volume/Å <sup>3</sup>                          | 4737.3(4)                                                      |
| Z                                              | 8                                                              |
| $\rho_{\text{calc}}/\text{g}/\text{cm}^3$      | 2.283                                                          |
| $\mu/\text{mm}^{-1}$                           | 1.809                                                          |
| F(000)                                         | 3104.0                                                         |
| Crystal size/mm <sup>3</sup>                   | 0.35 × 0.12 × 0.08                                             |
| Radiation                                      | MoK $\alpha$ ( $\lambda$ = 0.71073)                            |
| 2 $\theta$ range for data collection/ $^\circ$ | 5.836 to 61.128                                                |
| Index ranges                                   | -26 ≤ h ≤ 26, -41 ≤ k ≤ 41, -12 ≤ l ≤ 12                       |
| Reflections collected                          | 64520                                                          |
| Independent reflections                        | 14467 [R <sub>int</sub> = 0.0339, R <sub>sigma</sub> = 0.0281] |
| Data/restraints/parameters                     | 14467/121/787                                                  |
| Goodness-of-fit on F <sup>2</sup>              | 1.082                                                          |
| Final R indexes [ $ I  \geq 2\sigma(I)$ ]      | R1 = 0.0273, wR2 = 0.0601                                      |
| Final R indexes [all data]                     | R1 = 0.0301, wR2 = 0.0610                                      |
| Largest diff. peak/hole / e Å <sup>-3</sup>    | 1.08/-0.80                                                     |
| Flack parameter                                | 0.49(2)                                                        |

**Table S5.** Bond Lengths for [Ag-CF<sub>3</sub>•(C<sub>2</sub>H<sub>4</sub>)]<sub>2</sub>.

| Atom | Atom | Length/Å | Atom | Atom | Length/Å |
|------|------|----------|------|------|----------|
| Ag1  | N1   | 2.223(4) | Ag3  | N5   | 2.215(4) |
| Ag1  | N3   | 2.231(3) | Ag3  | N7   | 2.224(3) |
| Ag1  | C13  | 2.287(5) | Ag3  | C29  | 2.276(5) |
| Ag1  | C14  | 2.272(5) | Ag3  | C30  | 2.264(5) |
| Ag2  | N2   | 2.242(4) | Ag4  | N6   | 2.241(4) |

**Table S5.** Bond Lengths for [Ag-CF<sub>3</sub>•(C<sub>2</sub>H<sub>4</sub>)]<sub>2</sub>.

| Atom Atom Length/Å |     |          | Atom Atom Length/Å |     |          |
|--------------------|-----|----------|--------------------|-----|----------|
| Ag2                | N4  | 2.235(3) | Ag4                | N8  | 2.240(3) |
| Ag2                | C15 | 2.287(5) | Ag4                | C31 | 2.305(5) |
| Ag2                | C16 | 2.281(5) | Ag4                | C32 | 2.284(5) |
| F1                 | C4  | 1.332(6) | F19                | C20 | 1.338(6) |
| F2                 | C4  | 1.327(6) | F20                | C20 | 1.330(6) |
| F3                 | C4  | 1.320(6) | F21                | C20 | 1.341(6) |
| F4                 | C5  | 1.334(6) | F22                | C21 | 1.332(6) |
| F5                 | C5  | 1.331(7) | F23                | C21 | 1.350(7) |
| F6                 | C5  | 1.330(6) | F24                | C21 | 1.337(6) |
| F7                 | C6  | 1.332(6) | F25                | C22 | 1.340(6) |
| F8                 | C6  | 1.338(5) | F26                | C22 | 1.339(5) |
| F9                 | C6  | 1.342(6) | F27                | C22 | 1.327(6) |
| F10                | C10 | 1.334(5) | F28                | C26 | 1.323(6) |
| F11                | C10 | 1.336(5) | F29                | C26 | 1.339(6) |
| F12                | C10 | 1.332(5) | F30                | C26 | 1.329(5) |
| F13                | C11 | 1.334(6) | F31                | C27 | 1.326(5) |
| F14                | C11 | 1.321(7) | F32                | C27 | 1.325(6) |
| F15                | C11 | 1.338(7) | F33                | C27 | 1.329(6) |
| F16                | C12 | 1.332(7) | F34                | C28 | 1.335(6) |
| F17                | C12 | 1.319(6) | F35                | C28 | 1.327(5) |
| F18                | C12 | 1.330(6) | F36                | C28 | 1.335(6) |
| N1                 | N2  | 1.353(5) | N5                 | N6  | 1.354(5) |
| N1                 | C1  | 1.335(6) | N5                 | C17 | 1.342(6) |
| N2                 | C3  | 1.336(6) | N6                 | C19 | 1.337(5) |
| N3                 | N4  | 1.355(4) | N7                 | N8  | 1.350(4) |
| N3                 | C7  | 1.334(5) | N7                 | C23 | 1.336(5) |
| N4                 | C9  | 1.340(5) | N8                 | C25 | 1.345(5) |
| C1                 | C2  | 1.393(6) | C17                | C18 | 1.391(6) |
| C1                 | C4  | 1.496(6) | C17                | C20 | 1.495(6) |
| C2                 | C3  | 1.390(6) | C18                | C19 | 1.396(6) |

**Table S5.** Bond Lengths for [Ag-CF<sub>3</sub>•(C<sub>2</sub>H<sub>4</sub>)]<sub>2</sub>.

| Atom Atom Length/Å |     |          | Atom Atom Length/Å |     |          |
|--------------------|-----|----------|--------------------|-----|----------|
| C2                 | C5  | 1.490(7) | C18                | C21 | 1.467(7) |
| C3                 | C6  | 1.485(6) | C19                | C22 | 1.498(6) |
| C7                 | C8  | 1.387(6) | C23                | C24 | 1.393(5) |
| C7                 | C10 | 1.494(6) | C23                | C26 | 1.492(5) |
| C8                 | C9  | 1.387(6) | C24                | C25 | 1.392(6) |
| C8                 | C11 | 1.492(6) | C24                | C27 | 1.492(6) |
| C9                 | C12 | 1.494(6) | C25                | C28 | 1.499(6) |
| C13                | C14 | 1.359(7) | C29                | C30 | 1.331(8) |
| C15                | C16 | 1.349(8) | C31                | C32 | 1.335(8) |

**Table S6.** Bond Angles for [Ag-CF<sub>3</sub>•(C<sub>2</sub>H<sub>4</sub>)]<sub>2</sub>.

| Atom Atom Atom Angle/° |     |     |            | Atom Atom Atom Angle/° |     |     |            |
|------------------------|-----|-----|------------|------------------------|-----|-----|------------|
| N1                     | Ag1 | N3  | 102.23(13) | N5                     | Ag3 | N7  | 101.50(14) |
| N1                     | Ag1 | C13 | 113.44(17) | N5                     | Ag3 | C29 | 112.46(17) |
| N1                     | Ag1 | C14 | 148.00(16) | N5                     | Ag3 | C30 | 146.45(17) |
| N3                     | Ag1 | C13 | 144.06(18) | N7                     | Ag3 | C29 | 145.57(19) |
| N3                     | Ag1 | C14 | 109.40(17) | N7                     | Ag3 | C30 | 111.60(18) |
| C14                    | Ag1 | C13 | 34.69(19)  | C30                    | Ag3 | C29 | 34.1(2)    |
| N2                     | Ag2 | C15 | 113.14(18) | N6                     | Ag4 | C31 | 109.83(18) |
| N2                     | Ag2 | C16 | 147.35(17) | N6                     | Ag4 | C32 | 143.63(17) |
| N4                     | Ag2 | N2  | 101.25(13) | N8                     | Ag4 | N6  | 103.16(14) |
| N4                     | Ag2 | C15 | 144.88(19) | N8                     | Ag4 | C31 | 146.0(2)   |
| N4                     | Ag2 | C16 | 111.36(17) | N8                     | Ag4 | C32 | 112.75(19) |
| C16                    | Ag2 | C15 | 34.3(2)    | C32                    | Ag4 | C31 | 33.8(2)    |
| N2                     | N1  | Ag1 | 119.0(3)   | N6                     | N5  | Ag3 | 117.7(3)   |
| C1                     | N1  | Ag1 | 133.3(3)   | C17                    | N5  | Ag3 | 134.1(3)   |
| C1                     | N1  | N2  | 107.7(4)   | C17                    | N5  | N6  | 108.2(3)   |
| N1                     | N2  | Ag2 | 118.3(3)   | N5                     | N6  | Ag4 | 117.6(3)   |

**Table S6.** Bond Angles for **[Ag-CF<sub>3</sub>•(C<sub>2</sub>H<sub>4</sub>)]<sub>2</sub>.**

| Atom | Atom | Atom | Angle/°  | Atom | Atom | Atom | Angle/°  |
|------|------|------|----------|------|------|------|----------|
| C3   | N2   | Ag2  | 133.2(3) | C19  | N6   | Ag4  | 134.8(3) |
| C3   | N2   | N1   | 108.5(4) | C19  | N6   | N5   | 107.5(3) |
| N4   | N3   | Ag1  | 118.6(2) | N8   | N7   | Ag3  | 118.4(2) |
| C7   | N3   | Ag1  | 133.2(3) | C23  | N7   | Ag3  | 132.9(3) |
| C7   | N3   | N4   | 108.1(3) | C23  | N7   | N8   | 108.5(3) |
| N3   | N4   | Ag2  | 118.6(2) | N7   | N8   | Ag4  | 116.8(2) |
| C9   | N4   | Ag2  | 133.3(3) | C25  | N8   | Ag4  | 135.7(3) |
| C9   | N4   | N3   | 107.8(3) | C25  | N8   | N7   | 107.6(3) |
| N1   | C1   | C2   | 110.5(4) | N5   | C17  | C18  | 110.5(4) |
| N1   | C1   | C4   | 120.0(4) | N5   | C17  | C20  | 119.8(4) |
| C2   | C1   | C4   | 129.5(4) | C18  | C17  | C20  | 129.7(4) |
| C1   | C2   | C5   | 128.8(4) | C17  | C18  | C19  | 102.7(4) |
| C3   | C2   | C1   | 103.3(4) | C17  | C18  | C21  | 128.3(4) |
| C3   | C2   | C5   | 127.9(4) | C19  | C18  | C21  | 129.1(4) |
| N2   | C3   | C2   | 110.0(4) | N6   | C19  | C18  | 111.0(4) |
| N2   | C3   | C6   | 120.6(4) | N6   | C19  | C22  | 119.8(4) |
| C2   | C3   | C6   | 129.4(4) | C18  | C19  | C22  | 129.2(4) |
| F1   | C4   | C1   | 111.7(4) | F19  | C20  | F21  | 106.5(4) |
| F2   | C4   | F1   | 106.3(4) | F19  | C20  | C17  | 111.7(4) |
| F2   | C4   | C1   | 112.4(4) | F20  | C20  | F19  | 106.6(4) |
| F3   | C4   | F1   | 106.4(4) | F20  | C20  | F21  | 107.2(4) |
| F3   | C4   | F2   | 107.4(4) | F20  | C20  | C17  | 112.8(4) |
| F3   | C4   | C1   | 112.3(4) | F21  | C20  | C17  | 111.7(4) |
| F4   | C5   | C2   | 111.9(4) | F22  | C21  | F23  | 105.4(5) |
| F5   | C5   | F4   | 106.0(5) | F22  | C21  | F24  | 107.1(5) |
| F5   | C5   | C2   | 112.9(4) | F22  | C21  | C18  | 112.8(4) |
| F6   | C5   | F4   | 106.9(4) | F23  | C21  | C18  | 113.1(4) |
| F6   | C5   | F5   | 107.1(5) | F24  | C21  | F23  | 105.4(5) |
| F6   | C5   | C2   | 111.7(4) | F24  | C21  | C18  | 112.4(4) |

**Table S6.** Bond Angles for **[Ag-CF<sub>3</sub>•(C<sub>2</sub>H<sub>4</sub>)]<sub>2</sub>.**

| Atom | Atom | Atom | Angle/°  | Atom | Atom | Atom | Angle/°  |
|------|------|------|----------|------|------|------|----------|
| F7   | C6   | F8   | 107.1(4) | F25  | C22  | C19  | 111.3(4) |
| F7   | C6   | F9   | 106.8(4) | F26  | C22  | F25  | 106.4(4) |
| F7   | C6   | C3   | 112.1(4) | F26  | C22  | C19  | 112.4(4) |
| F8   | C6   | F9   | 106.0(4) | F27  | C22  | F25  | 106.4(4) |
| F8   | C6   | C3   | 112.6(4) | F27  | C22  | F26  | 106.9(4) |
| F9   | C6   | C3   | 111.9(4) | F27  | C22  | C19  | 113.0(4) |
| N3   | C7   | C8   | 110.3(4) | N7   | C23  | C24  | 110.3(3) |
| N3   | C7   | C10  | 120.1(4) | N7   | C23  | C26  | 119.7(3) |
| C8   | C7   | C10  | 129.5(4) | C24  | C23  | C26  | 130.0(4) |
| C7   | C8   | C11  | 127.7(4) | C23  | C24  | C27  | 128.1(4) |
| C9   | C8   | C7   | 103.6(4) | C25  | C24  | C23  | 103.1(3) |
| C9   | C8   | C11  | 128.7(4) | C25  | C24  | C27  | 128.9(4) |
| N4   | C9   | C8   | 110.2(3) | N8   | C25  | C24  | 110.5(3) |
| N4   | C9   | C12  | 119.6(4) | N8   | C25  | C28  | 120.2(4) |
| C8   | C9   | C12  | 130.2(4) | C24  | C25  | C28  | 129.2(4) |
| F10  | C10  | F11  | 106.8(4) | F28  | C26  | F29  | 106.9(4) |
| F10  | C10  | C7   | 112.3(4) | F28  | C26  | F30  | 107.3(4) |
| F11  | C10  | C7   | 111.3(4) | F28  | C26  | C23  | 111.6(4) |
| F12  | C10  | F10  | 107.0(4) | F29  | C26  | C23  | 112.4(4) |
| F12  | C10  | F11  | 106.5(4) | F30  | C26  | F29  | 106.9(4) |
| F12  | C10  | C7   | 112.7(4) | F30  | C26  | C23  | 111.6(4) |
| F13  | C11  | F15  | 106.4(5) | F31  | C27  | F33  | 106.6(4) |
| F13  | C11  | C8   | 111.2(4) | F31  | C27  | C24  | 112.3(4) |
| F14  | C11  | F13  | 106.4(4) | F32  | C27  | F31  | 106.1(4) |
| F14  | C11  | F15  | 106.9(4) | F32  | C27  | F33  | 106.8(4) |
| F14  | C11  | C8   | 114.0(5) | F32  | C27  | C24  | 112.7(4) |
| F15  | C11  | C8   | 111.4(4) | F33  | C27  | C24  | 111.9(4) |
| F16  | C12  | C9   | 112.4(4) | F34  | C28  | F36  | 106.8(4) |
| F17  | C12  | F16  | 107.4(4) | F34  | C28  | C25  | 111.6(4) |

**Table S6.** Bond Angles for **[Ag-CF<sub>3</sub>•(C<sub>2</sub>H<sub>4</sub>)]<sub>2</sub>.**

| <b>Atom</b> | <b>Atom</b> | <b>Atom</b> | <b>Angle/°</b> | <b>Atom</b> | <b>Atom</b> | <b>Atom</b> | <b>Angle/°</b> |
|-------------|-------------|-------------|----------------|-------------|-------------|-------------|----------------|
| F17         | C12         | F18         | 107.1(4)       | F35         | C28         | F34         | 106.9(4)       |
| F17         | C12         | C9          | 112.0(4)       | F35         | C28         | F36         | 107.3(4)       |
| F18         | C12         | F16         | 105.6(4)       | F35         | C28         | C25         | 111.7(4)       |
| F18         | C12         | C9          | 111.9(4)       | F36         | C28         | C25         | 112.2(4)       |
| C14         | C13         | Ag1         | 72.1(3)        | C30         | C29         | Ag3         | 72.4(3)        |
| C13         | C14         | Ag1         | 73.2(3)        | C29         | C30         | Ag3         | 73.5(3)        |
| C16         | C15         | Ag2         | 72.6(3)        | C32         | C31         | Ag4         | 72.3(3)        |
| C15         | C16         | Ag2         | 73.1(3)        | C31         | C32         | Ag4         | 73.9(3)        |



## **In situ synchrotron powder diffraction data collection (PXRD)**

*In situ* powder x-ray diffraction data (PXRD) from solid samples in ethylene or helium were collected using the monochromatic X-rays available at the Advanced Photon Source, Argonne National Laboratory, beamline 17-BM. We used a circular incident beam (300  $\mu\text{m}$  diameter) with  $\sim 0.45$  Å wavelength for experiments in conjunction with a VAREX 4343 amorphous-Si flat panel detector. Samples were loaded into 1.0 mm quartz capillaries with glass wool on either side. The capillary with sample was then loaded into a gas flow cell,<sup>[6]</sup> to perform *in situ* PXRD experiments. At one end the gas cell was connected to a two-way valve which allowed changing between a 1 atm helium flow and a high-pressure syringe pump (Teledyne ISCO 500D) which was filled with ethene gas. Pressure was monitored at the other end of the gas flow cell to make sure that there was no blockage or leak during the measurements. Pressures quoted are absolute, so a purge of helium or ethylene is a pressure of 1 bar. Prior to measurements, all samples were activated with supercritical ethylene (295 K, 55 bar) as described.<sup>[7]</sup>

## Data Processing

The raw images were processed within GSAS-II,<sup>[8]</sup> refining the sample-to-detector distance and tilt of the detector relative to the beam based on data obtained for a  $\text{LaB}_6$  standard.<sup>[9]</sup> Collected 2D detector images from *in situ* powder diffraction data sets were reduced to 1D datasets of intensity vs. diffraction angle  $2\theta$  with GSAS-II. Plots such as Figure S1, showing the evolution of the PXRD data were prepared with the same software, in which the diffracted intensity is represented by a color scale. In all cases, time runs from the bottom to the top of the image. Individual scans

were analyzed using Topas-Academic software.<sup>[10]</sup> Structures from powder data were determined by simulated annealing, using the single crystal structures as a starting point. The pyrazole groups were incorporated as rigid bodies based on the average geometries from analogous single crystal data, with the CF<sub>3</sub> rotations freely refined. Selected bond distances, angles, and torsions were refined as appropriate. The unexpected structure of **[Ag-H•(C<sub>2</sub>H<sub>4</sub>)]<sub>3</sub>** was initially hypothesized from the volume of the indexed unit cell and was solved by repeated cycles of model building and refinement.

CIF files (PXRD based and from *in situ* synthesis) of previously unknown dinuclear **[Ag-Br•(C<sub>2</sub>H<sub>4</sub>)]<sub>2</sub>** and trinuclear **[Ag-H•(C<sub>2</sub>H<sub>4</sub>)]<sub>3</sub>** silver-ethylene complexes, along with the trinuclear precursor **[Ag-CF<sub>3</sub>]<sub>3</sub>** for which a single crystal was not available (for the latter, single crystal data have CH<sub>2</sub>Cl<sub>2</sub> as solvents of crystallization), have been deposited at the Cambridge Crystallographic Data Centre with CCDC numbers 2267047, 2266818, and 2266816 respectively.

Table S7 summarizes the crystal structures of all of the unsolvated silver pyrazolates discussed in this work.

**Table S7.** Selected crystal data for materials discussed in this paper.

| Compound                         | [Ag-Br] <sub>3</sub>                                                           | [Ag-Br•(C <sub>2</sub> H <sub>4</sub> )] <sub>2</sub>                                         | [Ag-H] <sub>3</sub>                                                           | [Ag-H] <sub>3</sub>                                                           | [Ag-H•(C <sub>2</sub> H <sub>4</sub> )] <sub>3</sub>                           | [Ag-CF <sub>3</sub> ] <sub>3</sub>                             | [Ag-CF <sub>3</sub> •(C <sub>2</sub> H <sub>4</sub> )] <sub>2</sub>           |
|----------------------------------|--------------------------------------------------------------------------------|-----------------------------------------------------------------------------------------------|-------------------------------------------------------------------------------|-------------------------------------------------------------------------------|--------------------------------------------------------------------------------|----------------------------------------------------------------|-------------------------------------------------------------------------------|
| Method                           | Single Crystal                                                                 | Powder                                                                                        | Single Crystal                                                                | Single Crystal                                                                | Powder                                                                         | Powder                                                         | Single Crystal                                                                |
| CCDC deposition                  | PIVJUB                                                                         | 2267047                                                                                       | XELXER                                                                        | DAZGIV                                                                        | 2266818                                                                        | 2266816                                                        | 2256900                                                                       |
| Temperature / K                  | 100                                                                            | 173                                                                                           | 293                                                                           | 100                                                                           | 173                                                                            | 295                                                            | 100                                                                           |
| Atmosphere                       |                                                                                | 10 bar C <sub>2</sub> H <sub>4</sub>                                                          |                                                                               |                                                                               | 10 bar C <sub>2</sub> H <sub>4</sub>                                           | He flow                                                        |                                                                               |
| Formula                          | C <sub>15</sub> Ag <sub>3</sub> Br <sub>3</sub> F <sub>18</sub> N <sub>6</sub> | C <sub>15</sub> H <sub>8</sub> Ag <sub>2</sub> Br <sub>2</sub> F <sub>12</sub> N <sub>4</sub> | C <sub>15</sub> H <sub>3</sub> Ag <sub>3</sub> F <sub>18</sub> N <sub>6</sub> | C <sub>15</sub> H <sub>3</sub> Ag <sub>3</sub> F <sub>18</sub> N <sub>6</sub> | C <sub>21</sub> H <sub>15</sub> Ag <sub>3</sub> F <sub>18</sub> N <sub>6</sub> | C <sub>18</sub> Ag <sub>3</sub> F <sub>27</sub> N <sub>6</sub> | C <sub>16</sub> H <sub>8</sub> Ag <sub>2</sub> F <sub>18</sub> N <sub>4</sub> |
| Formula Wt                       | 1169.5                                                                         | 835.8                                                                                         | 932.8                                                                         | 932.8                                                                         | 1017.0                                                                         | 1136.8                                                         | 814.0                                                                         |
| Space Group                      | <i>Pbca</i>                                                                    | <i>C222</i> <sub>1</sub>                                                                      | <i>C2/c</i>                                                                   | <i>P</i> −1                                                                   | <i>C2/c</i>                                                                    | <i>P</i> −1                                                    | <i>Pna2</i> <sub>1</sub>                                                      |
| <i>a</i> / Å                     | 15.3955                                                                        | 14.1527                                                                                       | 23.078                                                                        | 10.1597                                                                       | 12.9987                                                                        | 10.3875                                                        | 18.4248                                                                       |
| <i>b</i> / Å                     | 14.0979                                                                        | 18.3542                                                                                       | 13.4835                                                                       | 10.5111                                                                       | 13.4064                                                                        | 10.7481                                                        | 29.1743                                                                       |
| <i>c</i> / Å                     | 23.9071                                                                        | 17.8705                                                                                       | 23.773                                                                        | 11.6798                                                                       | 17.8789                                                                        | 13.9603                                                        | 8.813                                                                         |
| <i>α</i> (deg)                   | 90                                                                             | 90                                                                                            | 90                                                                            | 74.034                                                                        | 90                                                                             | 76.5993                                                        | 90                                                                            |
| <i>β</i> (deg)                   | 90                                                                             | 90                                                                                            | 97.014                                                                        | 74.724                                                                        | 97.4355                                                                        | 72.7054                                                        | 90                                                                            |
| <i>γ</i> (deg)                   | 90                                                                             | 90                                                                                            | 90                                                                            | 78.434                                                                        | 90                                                                             | 85.8995                                                        | 90                                                                            |
| Cell Volume (Å <sup>3</sup> )    | 5188.9                                                                         | 4642.1                                                                                        | 7342.1                                                                        | 1145.7                                                                        | 3089.5                                                                         | 1447.6                                                         | 4737.3                                                                        |
| Vol / molecule (Å <sup>3</sup> ) | 648.6                                                                          | 580.3                                                                                         | 611.8                                                                         | 572.9                                                                         | 772.4                                                                          | 723.8                                                          | 592.2                                                                         |
| <i>Z</i> / <i>Z'</i>             | 8 / 1                                                                          | 8 / 1                                                                                         | 12 / 1.5                                                                      | 2 / 1                                                                         | 4 / 0.5                                                                        | 2 / 1                                                          | 8 / 2                                                                         |
| <i>R</i> <sub>Profile</sub> (%)  |                                                                                | 2.25                                                                                          |                                                                               |                                                                               | 0.39                                                                           | 1.26                                                           |                                                                               |
| <i>R</i> <sub>Bragg</sub> (%)    | 3.13                                                                           | 2.53                                                                                          | 3.68                                                                          | 2.81                                                                          | 0.49                                                                           | 0.75                                                           | 3.01                                                                          |

## In situ Powder X-ray Diffraction Studies of $[\text{Ag}-\text{CF}_3]_3$

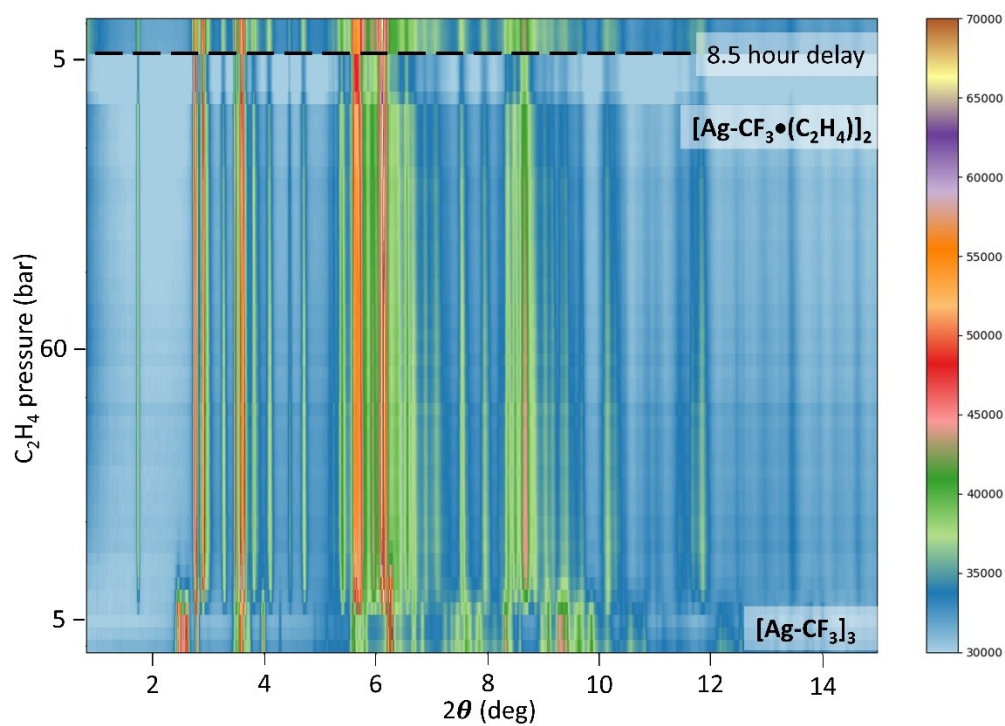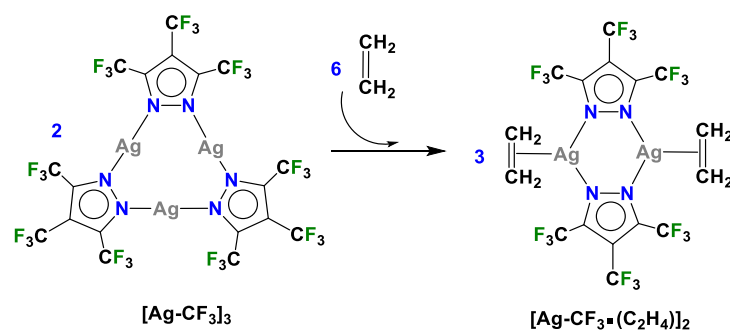

**Figure S10.** Conversion of  $[\text{Ag}-\text{CF}_3]_3$  to  $[\text{Ag}-\text{CF}_3\bullet(\text{C}_2\text{H}_4)]_2$  occurs at 3-5 bar at 295 K as evident from this experiment from 5-60-5 bar of ethylene at 295 K. This also shows that the reverse reaction does not take place at 295K under ethylene. Other experiments, not presented here, show that there is no solid-state reaction of ethylene with the unloaded trimer at 1 bar of ethylene flow at room temperature. Intensity scale (color bar on right) is in arbitrary units. The first scan, at bottom, was taken under He flow. Its trace, with Rietveld refinement, is shown in Figure S14.

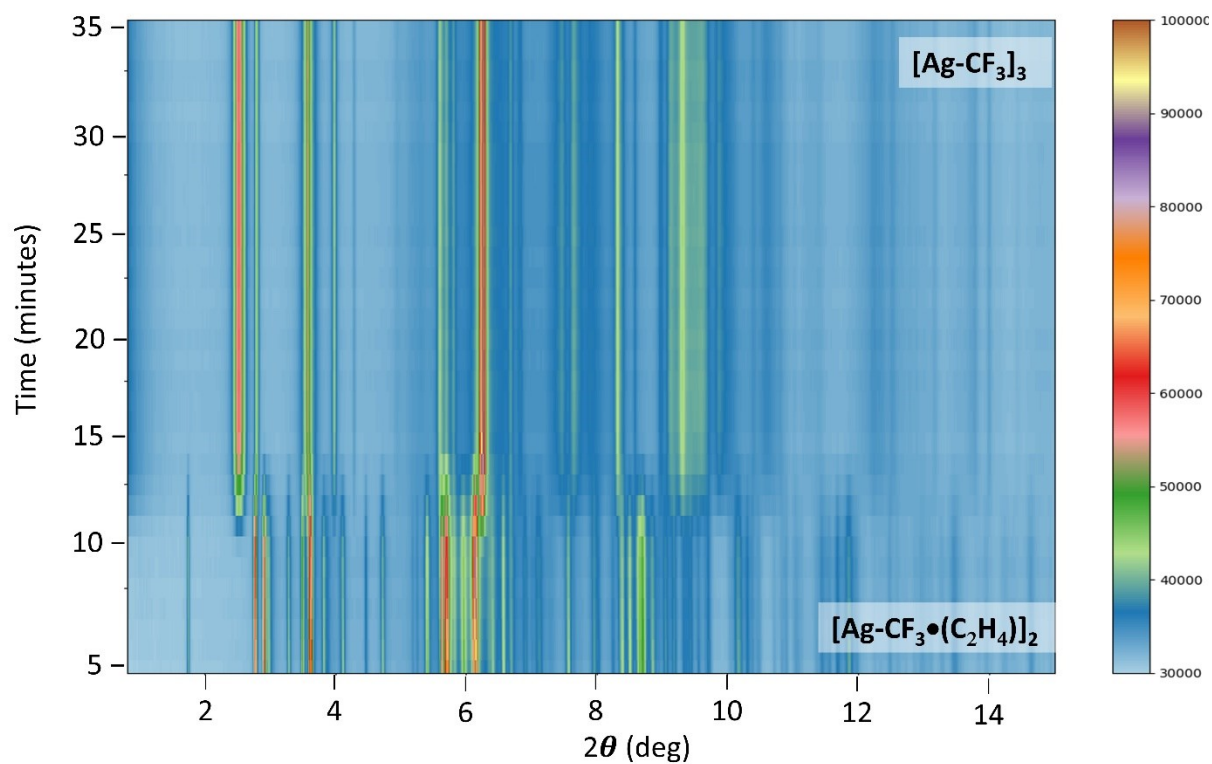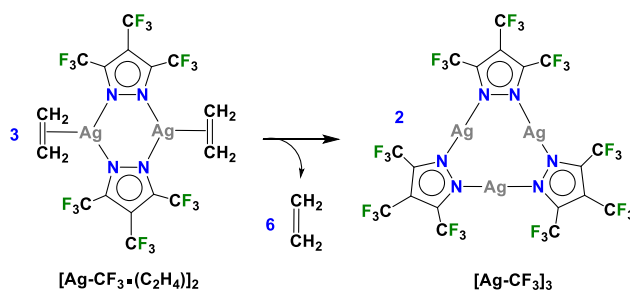

**Figure S11.** The  $[\text{Ag-CF}_3\bullet(\text{C}_2\text{H}_4)]_2$  to  $[\text{Ag-CF}_3]_3$  conversion (the ethylene loss) under helium flow ( $\sim 1$  bar) at 295 K. Intensity scale (color bar on right) is in arbitrary units. The first scan, at bottom, is shown in Fig. S15, with Rietveld fit.

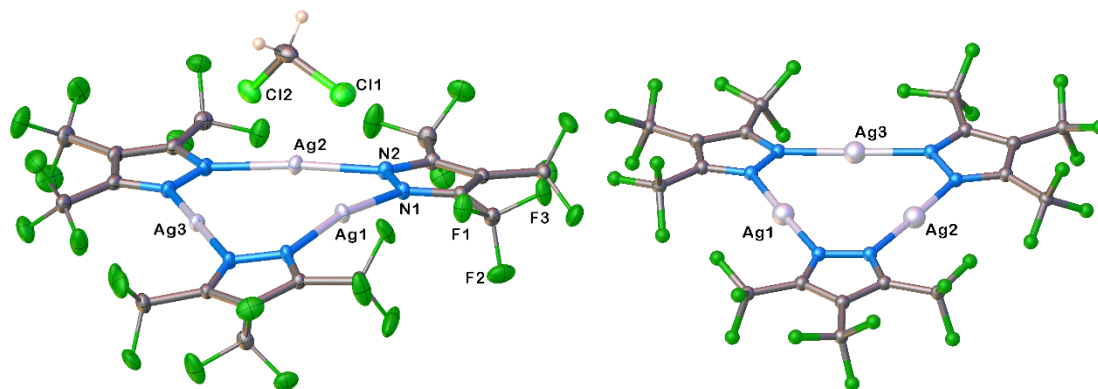

**Figure S12.** Single crystal X-ray structure of  $[\text{Ag-CF}_3]_3 \cdot \text{CH}_2\text{Cl}_2$  (on left) and powder X-ray diffraction structure of  $[\text{Ag-CF}_3]_3$  (on right).

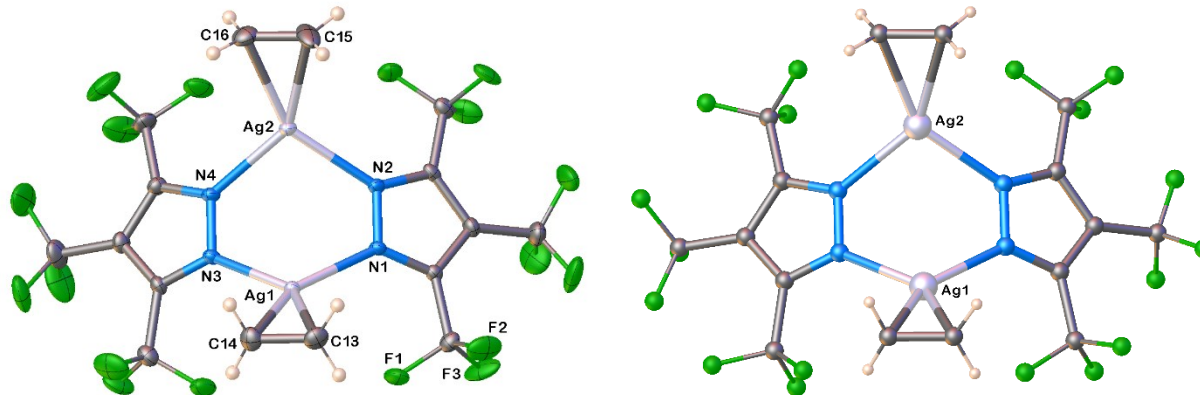

**Figure S13.** Molecular structure of  $[\text{Ag-CF}_3 \cdot (\text{C}_2\text{H}_4)]_2$  obtained from solution (left – using single crystal X-ray diffraction studies) and solid-state chemistry (right – from powder X-ray diffraction).

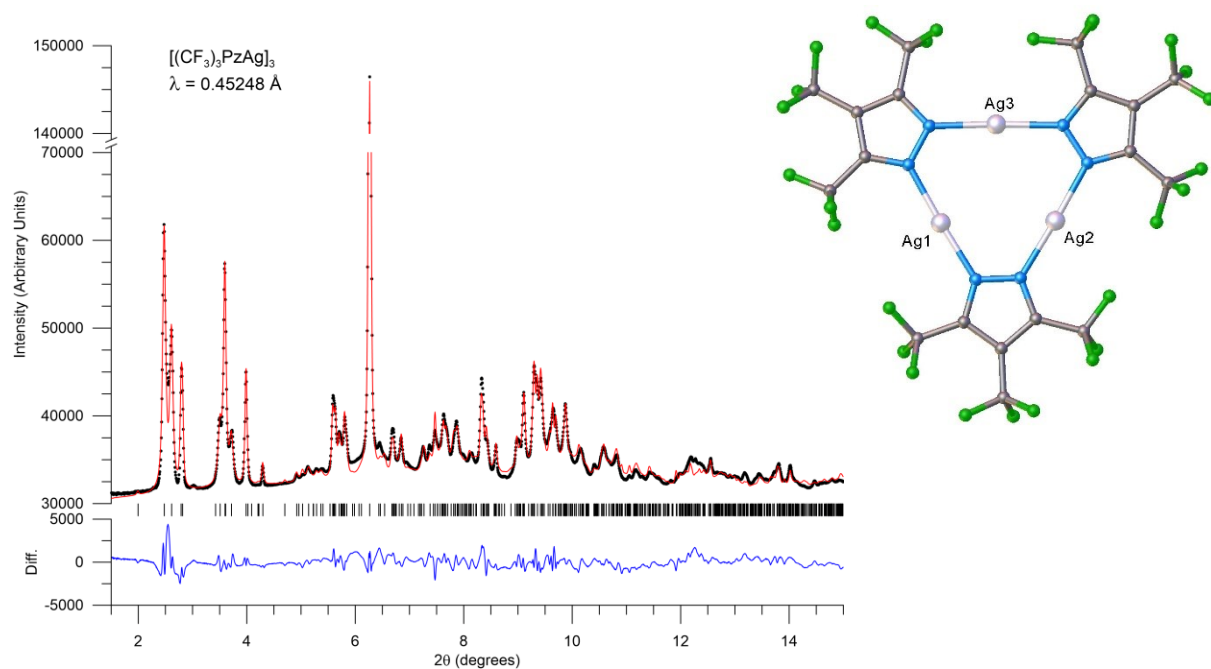

**Figure S14.** Rietveld fit of  $[Ag-CF_3]_3$ . This is the first data set shown at the bottom of Fig. S10, and is essentially identical to the data at the top of S11. Refined structure is illustrated on right. CCDC deposition 2266816.

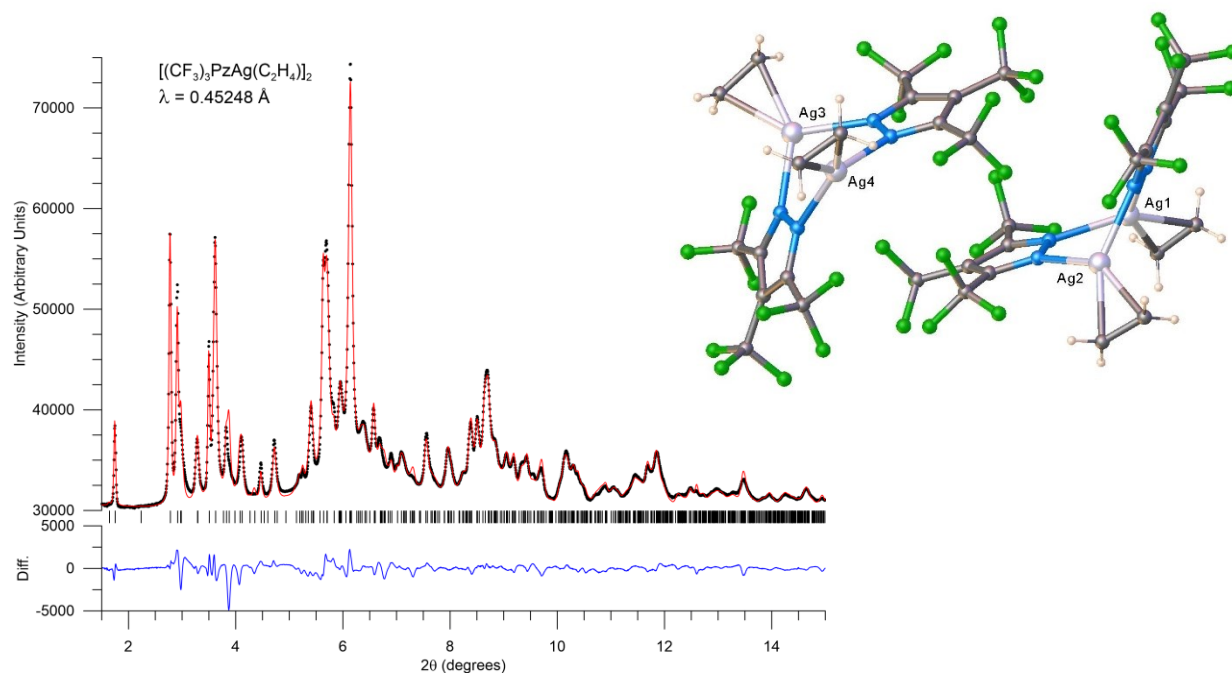

**Figure S15.** Rietveld fit of  $[Ag-CF_3\bullet(C_2H_4)]_2$ , from the first data set at the bottom of Fig. S11. Refined structure on right. CCDC deposition 2266817

## In situ Powder X-ray Diffraction Studies of $[\text{Ag-H}]_3$

$[\text{Ag-H}]_3$  reaction with pressure of  $\text{C}_2\text{H}_4$  60bar 295K(AgH3\_C2H4\_60bar)

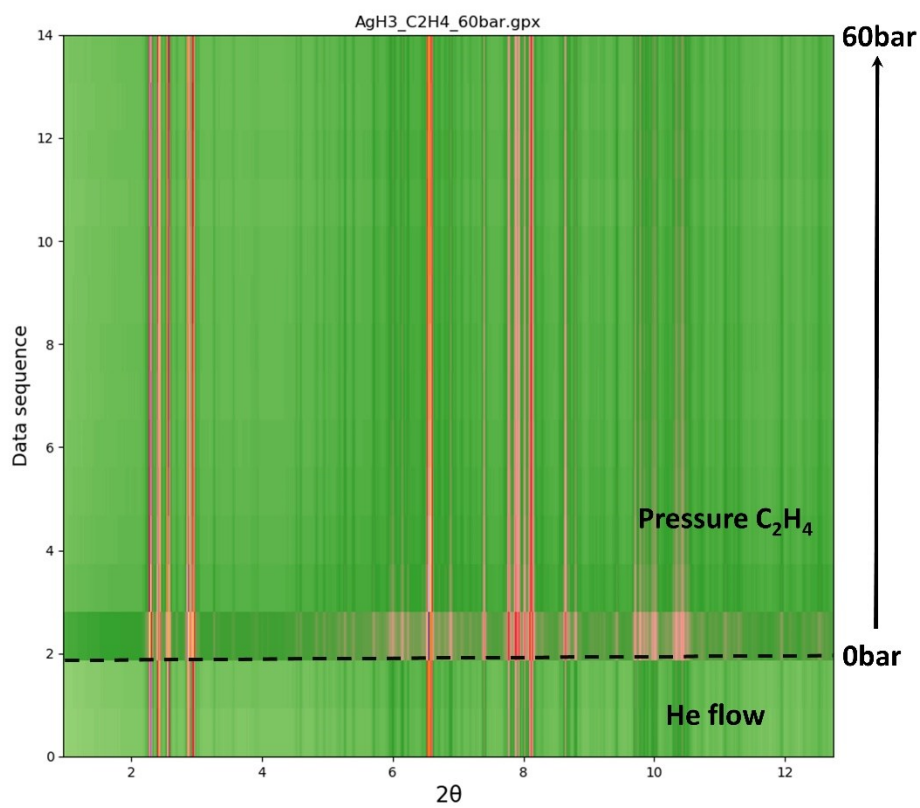

**Figure S16.** Evolution of the in situ PXRD patterns showing of ethylene and solid  $[\text{Ag-H}]_3$  reaction at 295 K with increasing ethylene pressure. No reaction was observed even at 60 bar.



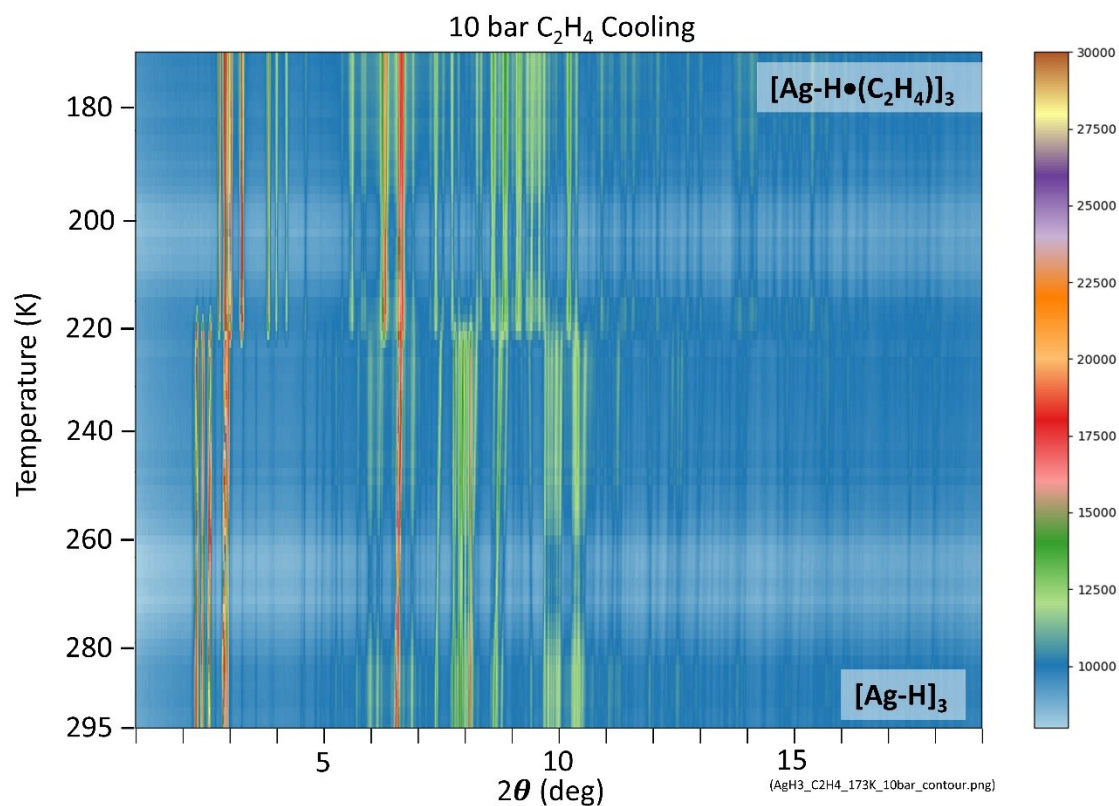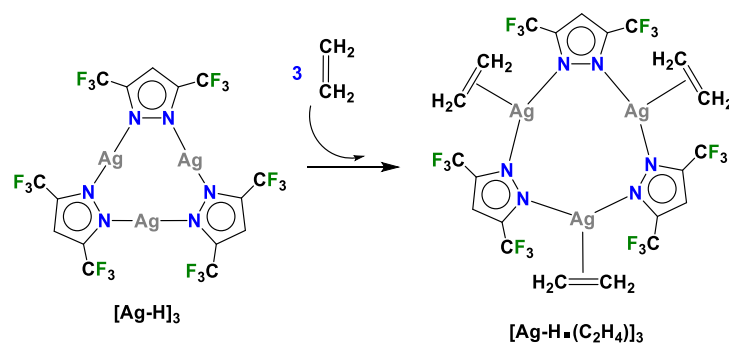

**Figure S17.** Evolution of the in situ PXRD patterns showing of ethylene and solid [Ag-H]<sub>3</sub> reaction at **10 bar ethylene** with decreasing temperature. Formation of a new phase confirmed as {[3,5-(CF<sub>3</sub>)<sub>2</sub>Pz]Ag(C<sub>2</sub>H<sub>4</sub>)}<sub>3</sub> (**[Ag-H•(C<sub>2</sub>H<sub>4</sub>)]<sub>3</sub>**) was observed starting at 223K. Intensity scale (color bar on right) is in arbitrary units.

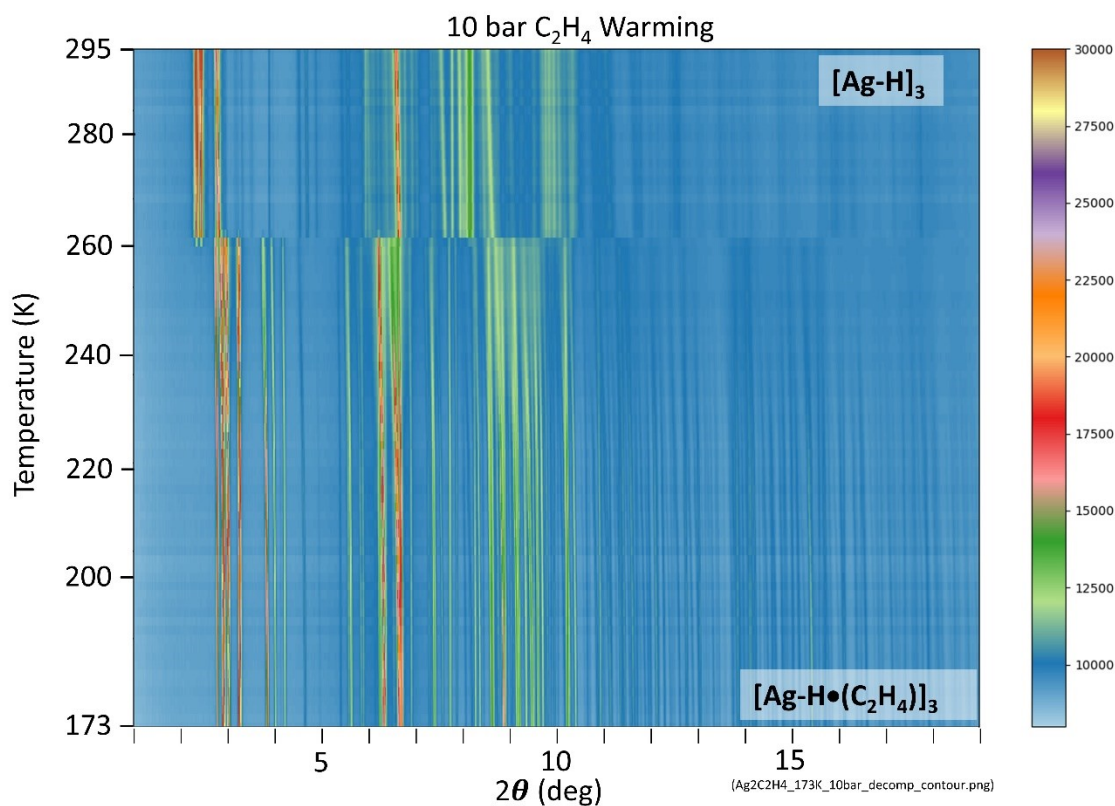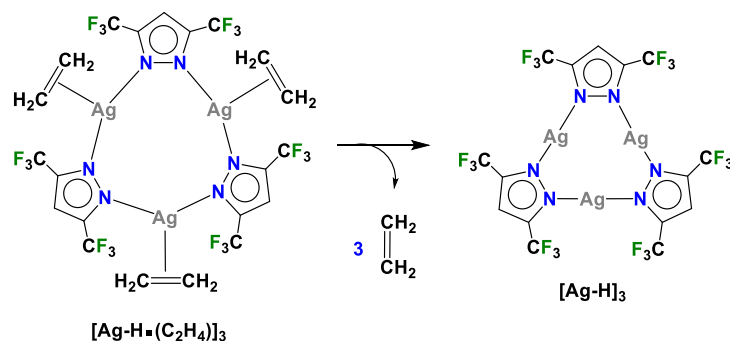

**Figure S18.** Evolution of the in situ PXRD patterns showing decomposition of  $\{[3,5-(\text{CF}_3)_2\text{Pz}]\text{Ag}(\text{C}_2\text{H}_4)\}_3$  (**[Ag-H•(C<sub>2</sub>H<sub>4</sub>)]<sub>3</sub>**) to produce ethylene free starting phase **[Ag-H]<sub>3</sub>** at 10 bar ethylene with increasing temperature. Conversion to **[Ag-H]<sub>3</sub>** was observed at 262K. Intensity scale (color bar on right) is in arbitrary units.

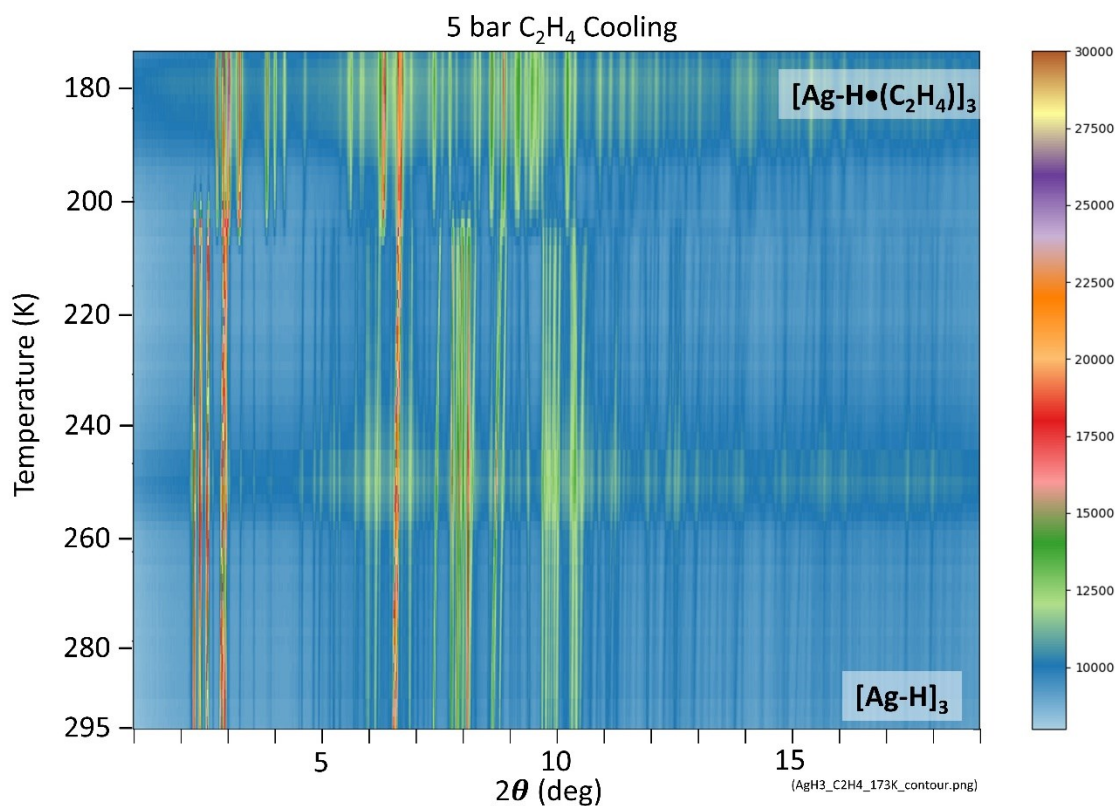

**Figure S19.** Evolution of the in situ PXRD patterns showing of ethylene and solid [Ag-H]<sub>3</sub> reaction at **5 bar ethylene** with decreasing temperature. Formation of a new phase was observed starting 206K. It was confirmed as {[3,5-(CF<sub>3</sub>)<sub>2</sub>Pz]Ag(C<sub>2</sub>H<sub>4</sub>)}<sub>3</sub> ([Ag-H•(C<sub>2</sub>H<sub>4</sub>)]<sub>3</sub>). Intensity scale (color bar on right) is in arbitrary units.

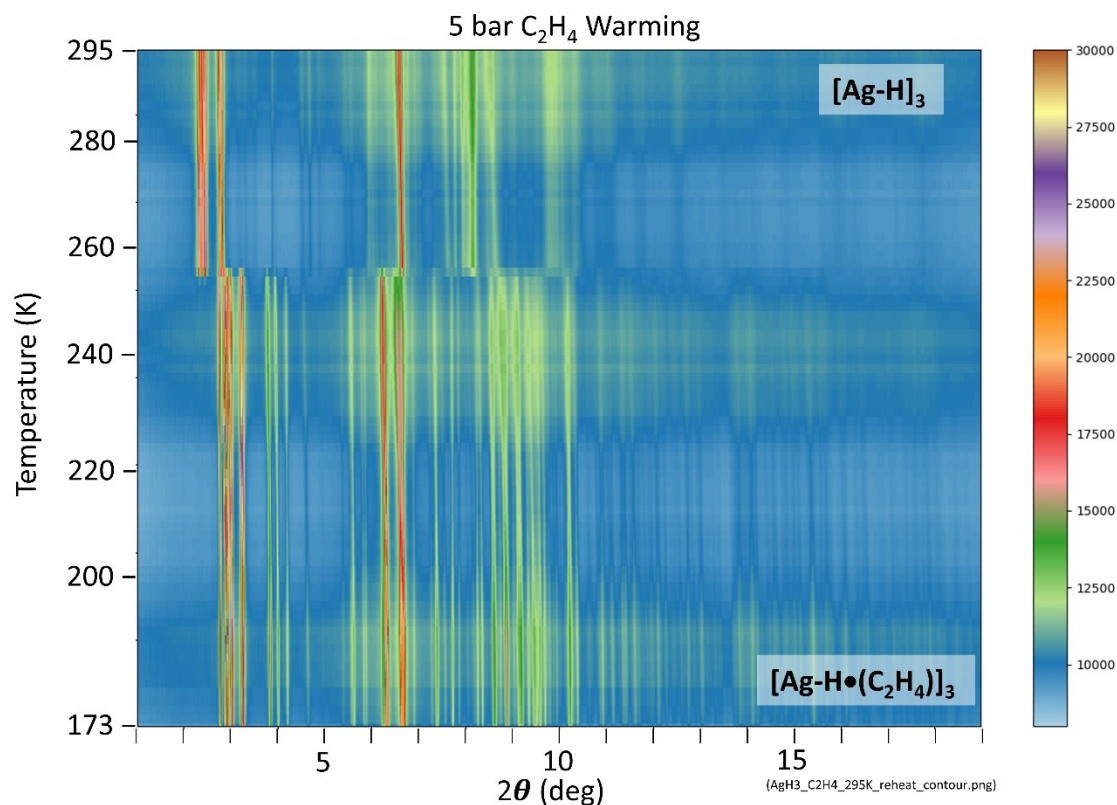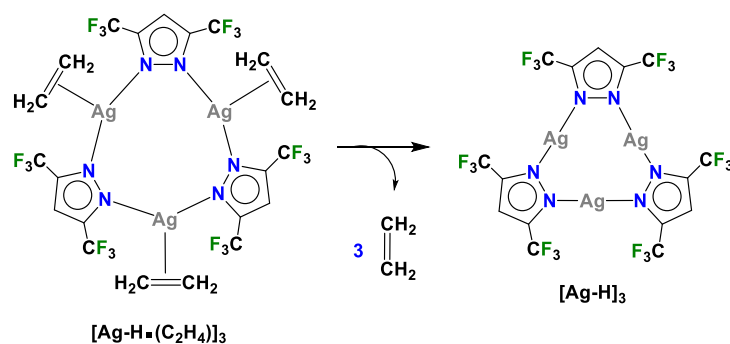

**Figure S20.** Evolution of the in situ PXRD patterns showing decomposition of  $\{[3,5-(\text{CF}_3)_2\text{Pz}]\text{Ag}(\text{C}_2\text{H}_4)\}_3$  (**[Ag-H•(C<sub>2</sub>H<sub>4</sub>)]<sub>3</sub>**) to produce ethylene free starting phase **[Ag-H]<sub>3</sub>** at 5 bar ethylene with increasing temperature. Conversion to **[Ag-H]<sub>3</sub>** was observed at 256K.

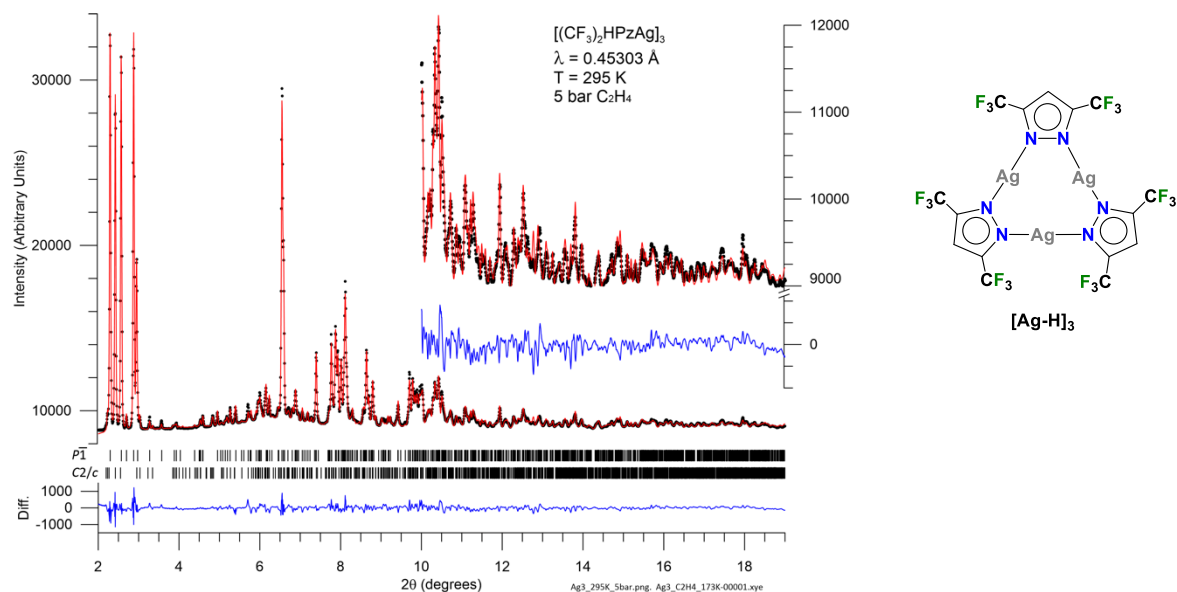

**Figure S21.** Rietveld fit of  $[\text{Ag-H}]_3$ , from the first scan shown at the bottom of Fig. S17. This sample is a mixture of the two crystal structures (i.e., polymorphs) of this compound, confirmed by comparisons to single crystal XRD. They are CCDC refcode DAZGIV (spacegroup P-1) 69%,<sup>[11]</sup> XELXER (spacegroup C2/c) 31%.<sup>[12]</sup>

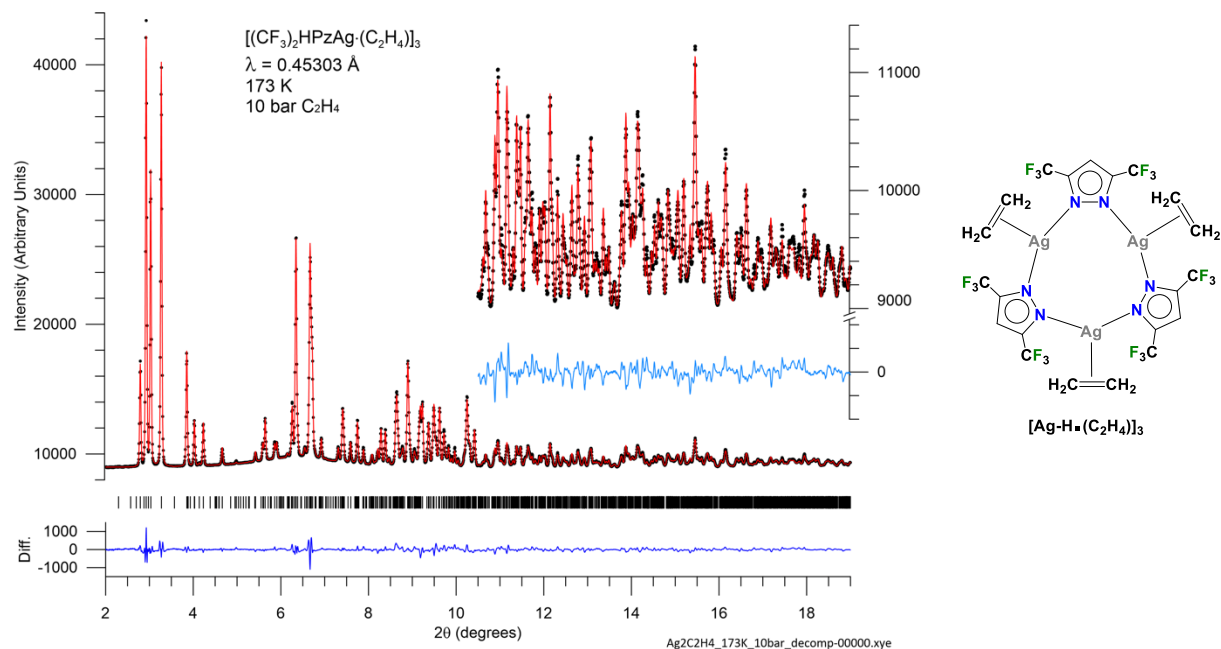

**Figure S22.** Rietveld fit of  $[\text{Ag-H}\bullet(\text{C}_2\text{H}_4)]_3$ , shown at bottom of panel Fig. S18. CCDC deposition 2266818.

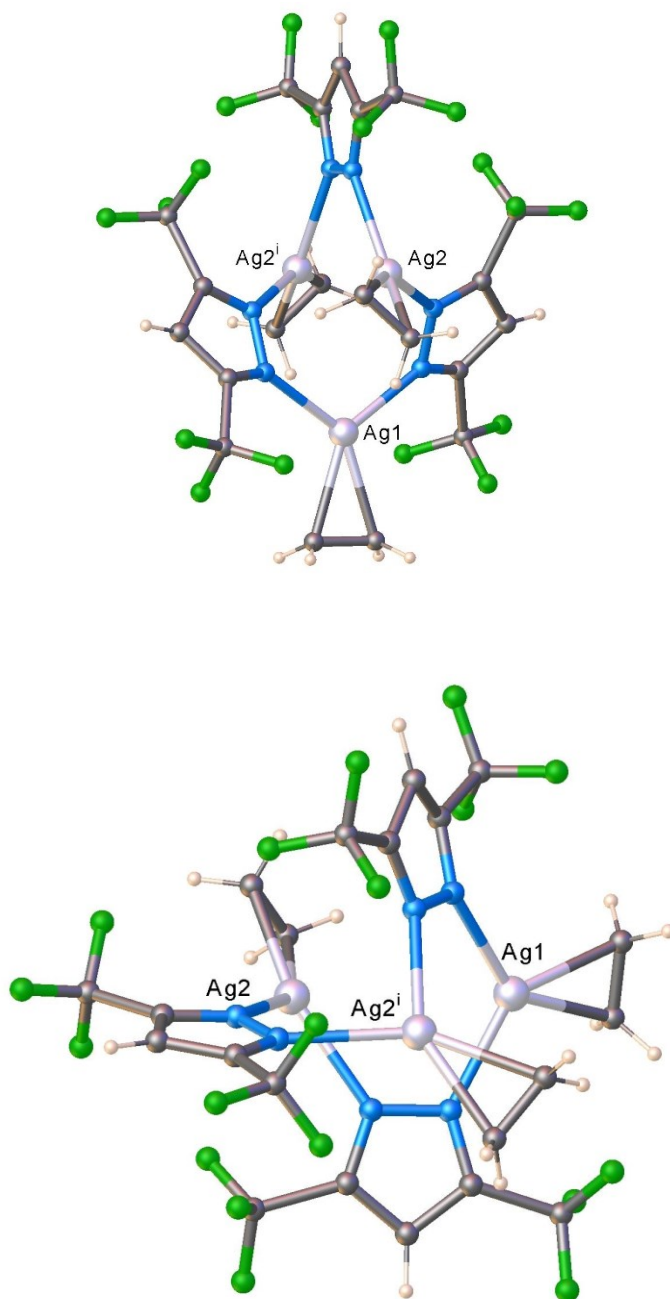

**Figure S23.** Two views of [Ag-H•(C<sub>2</sub>H<sub>4</sub>)]<sub>3</sub> molecular structure, determined from powder diffraction data. CCDC deposition 2266818.

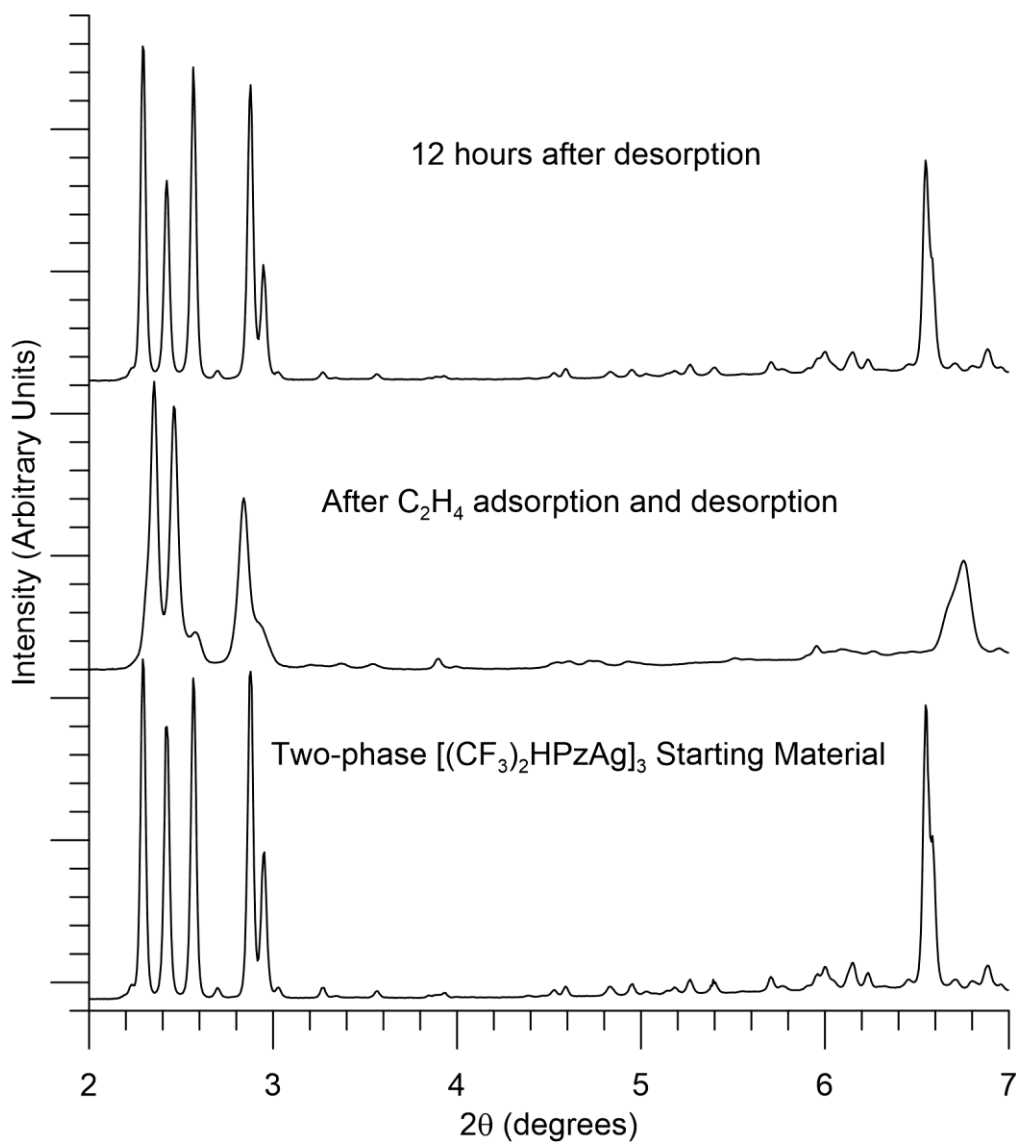

**Figure S24.** This shows evolution from the two-phase **[Ag-H]<sub>3</sub>** starting material in the bottom panel, to a disordered **[Ag-H]<sub>3</sub>** trimer phase (generated after ethylene uptake and removal cycle) in the middle panel. After 12 hours, the sample has settled into a clean mixture of the original two phases (see Figure S17 for information on different phases/polymorphs).



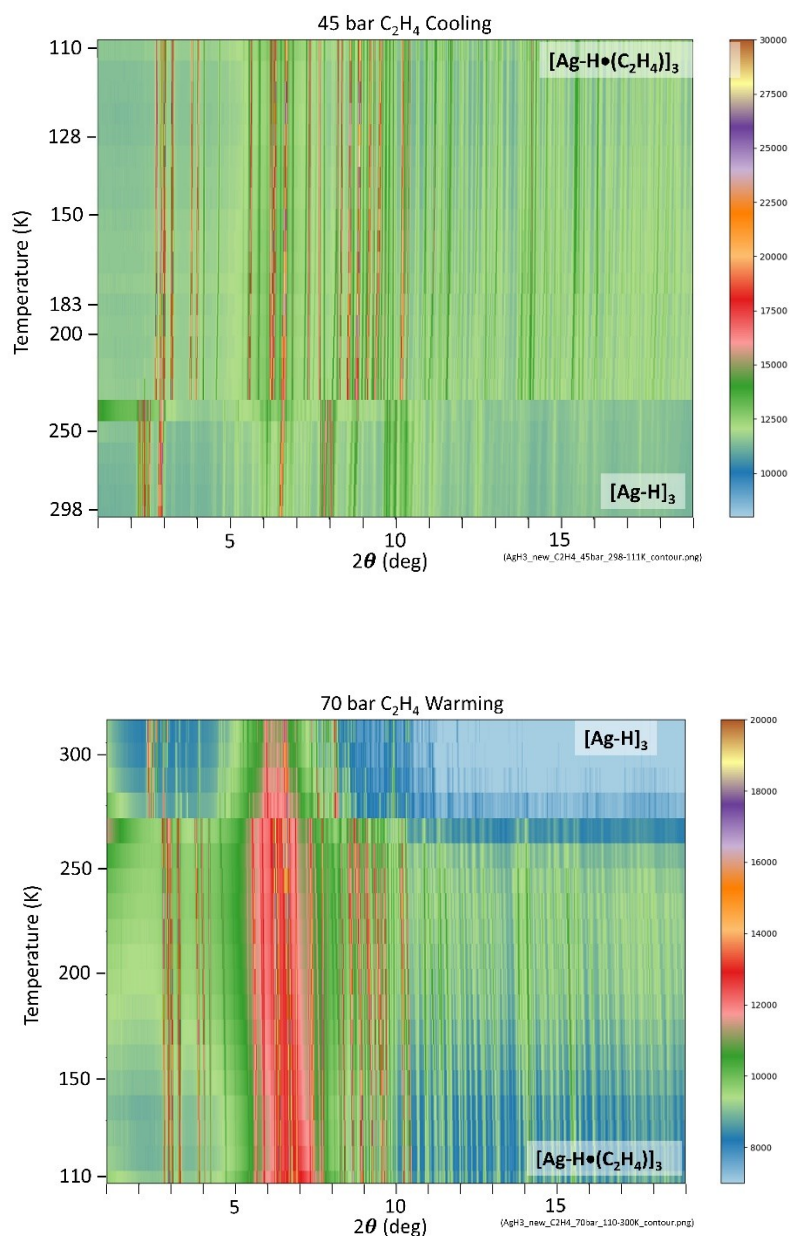

**Figure S25.** In search of  $[\text{Ag-H}\bullet(\text{C}_2\text{H}_4)]_2$  (transition of ethylene bound silver trimer to expected ethylene bound silver dimer) under extreme conditions. **Top:**  $[\text{Ag-H}]_3$  from room temperature to 110K at 45 bar of ethylene, **Bottom:** Warming  $[\text{Ag-H}\bullet(\text{C}_2\text{H}_4)]_3$  while maintaining very high ethylene pressure of 70 bar. In both cases no signs of a new phase (potentially  $[\text{Ag-H}\bullet(\text{C}_2\text{H}_4)]_2$ ) were observed. Warming leads to ethylene loss and  $[\text{Ag-H}]_3$  formation, even under high ethylene pressure.



## In situ Powder X-ray Diffraction Studies of $[\text{Ag-Br}]_3$

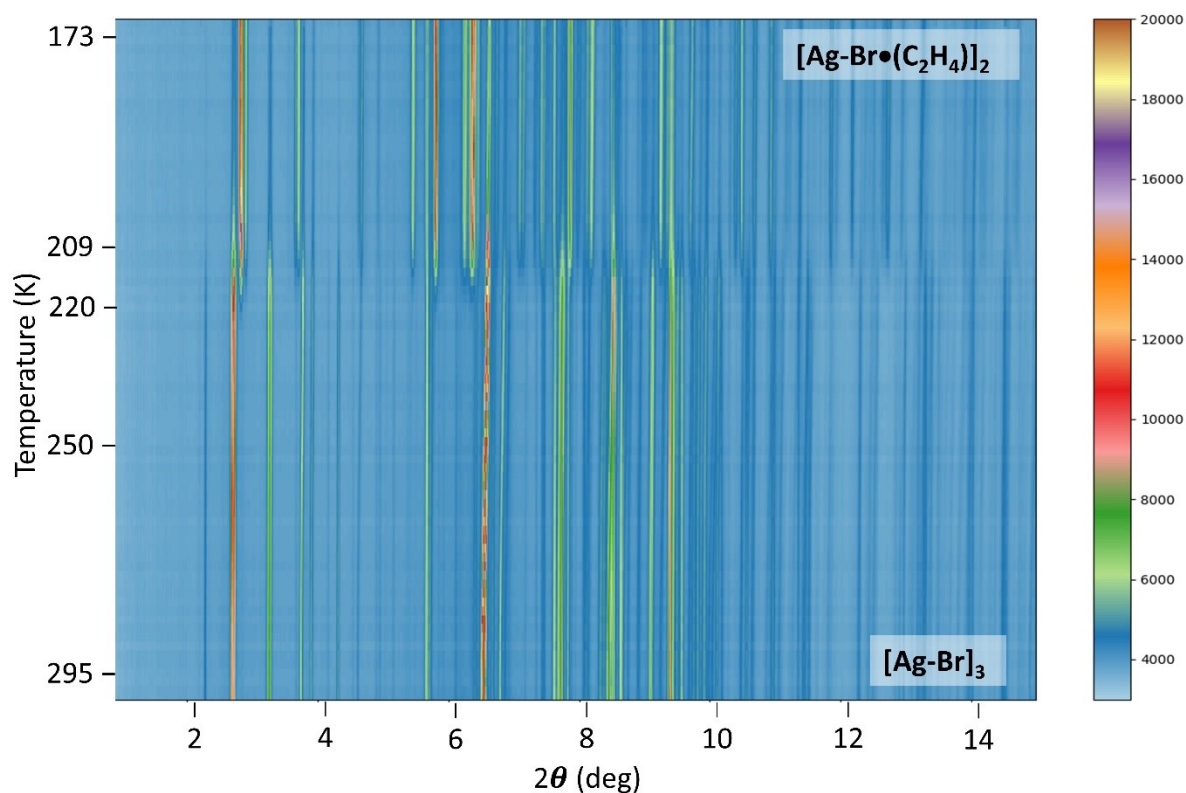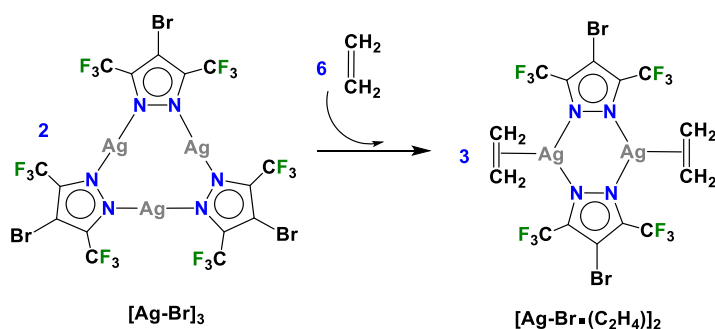

**Figure S26.** Evolution of the in situ PXRD patterns showing of ethylene and solid  $[\text{Ag-Br}]_3$  reaction at 10 bar ethylene with decreasing temperature. Formation of a new phase confirmed as  $\{[4\text{-Br-}3,5\text{-(CF}_3)_2\text{Pz}]\text{Ag}(\text{C}_2\text{H}_4)\}_2$  ( $[\text{Ag-Br}\bullet(\text{C}_2\text{H}_4)]_2$ ) was observed starting 220K through Rietveld fit shown in Fig. S29. Intensity scale (color bar on right) is in arbitrary units.

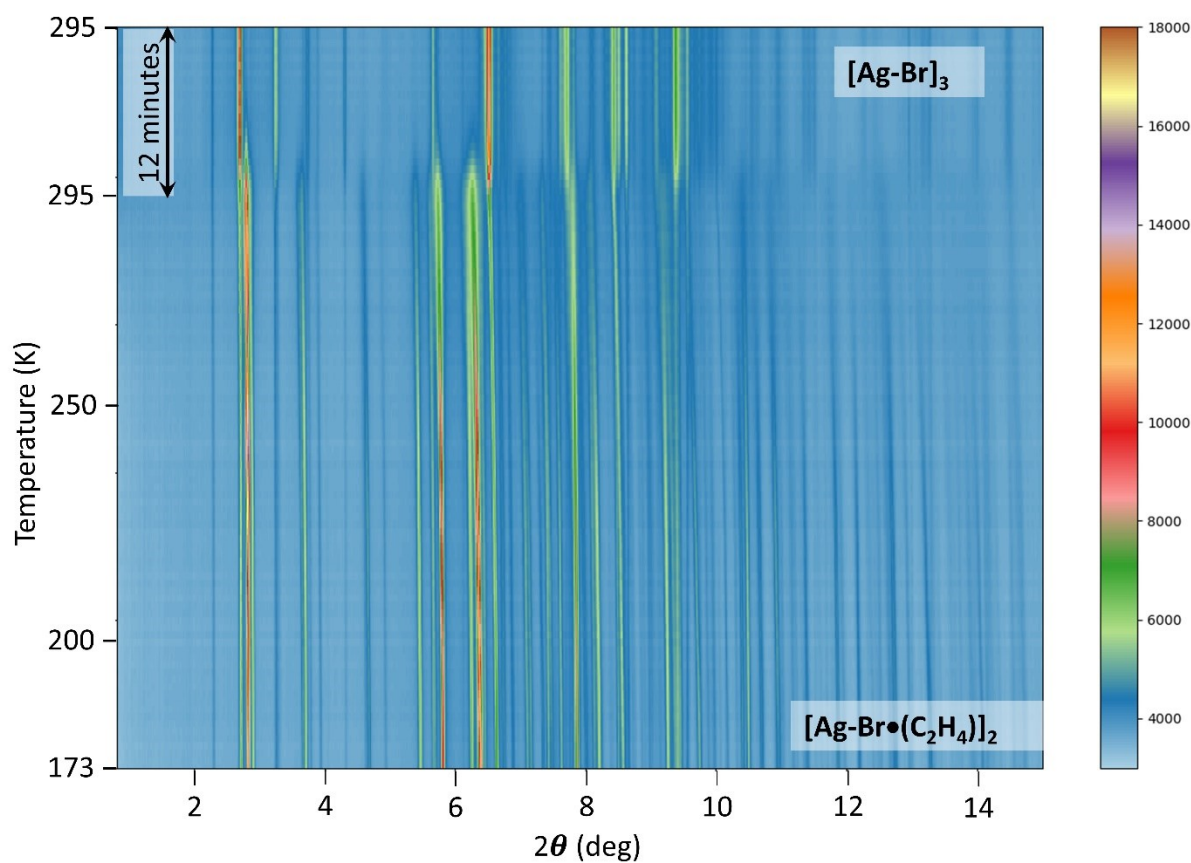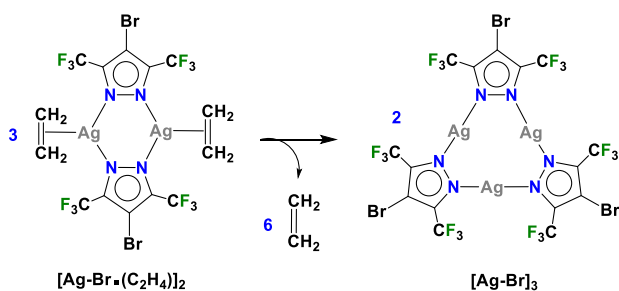

**Figure S27.** Evolution of the in situ PXRD patterns showing decomposition of {[4-Br-3,5-(CF<sub>3</sub>)<sub>2</sub>Pz]Ag(C<sub>2</sub>H<sub>4</sub>)}<sub>2</sub> (**[Ag-Br•(C<sub>2</sub>H<sub>4</sub>)]<sub>2</sub>**) to produce ethylene free starting phase **[Ag-Br]<sub>3</sub>** at 10 bar ethylene with increasing temperature. Conversion to **[Ag-Br]<sub>3</sub>** was observed at 295K (which was slow at 295K and 10 bar ethylene). Single crystal XRD structure of **[Ag-Br]<sub>3</sub>** (crystallized from solutions) has been reported and has CCDC refcode PIVJUB.<sup>[13]</sup>

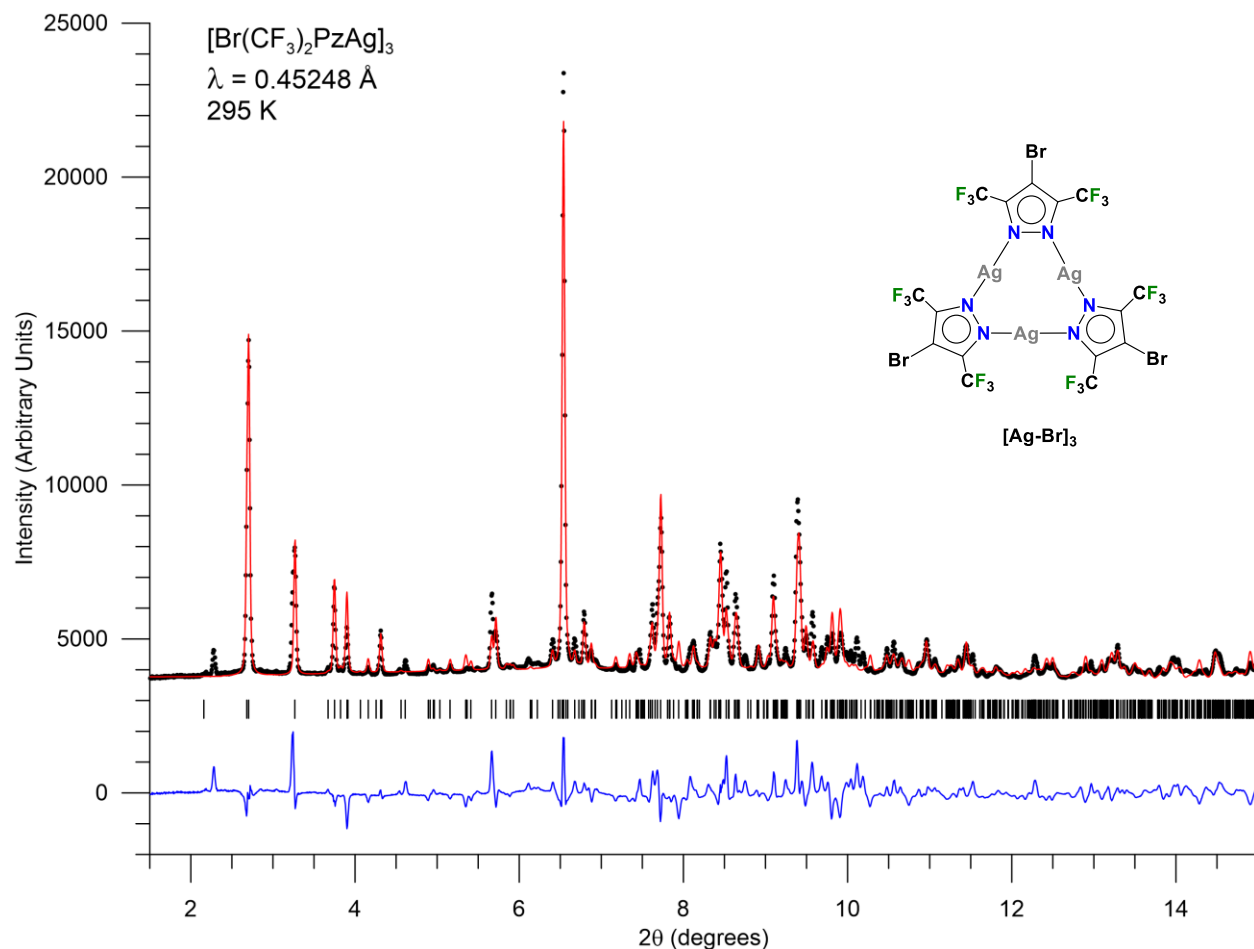

**Figure S28.** Rietveld of  $[\text{Ag-Br}]_3$  starting material, with several unidentified impurity peaks. Lattice parameters and position and orientation of molecule in unit cell were refined. This is the first (lowest) scan of contour plot of  $[\text{Ag-Br}]_3 \rightarrow [\text{Ag-Br} \cdot (\text{C}_2\text{H}_4)]_2$  in Figure S26. Single crystal XRD structure of  $[\text{Ag-Br}]_3$  (crystallized from solutions) has been reported and has CCDC refcode PIVJUB.<sup>[13]</sup>

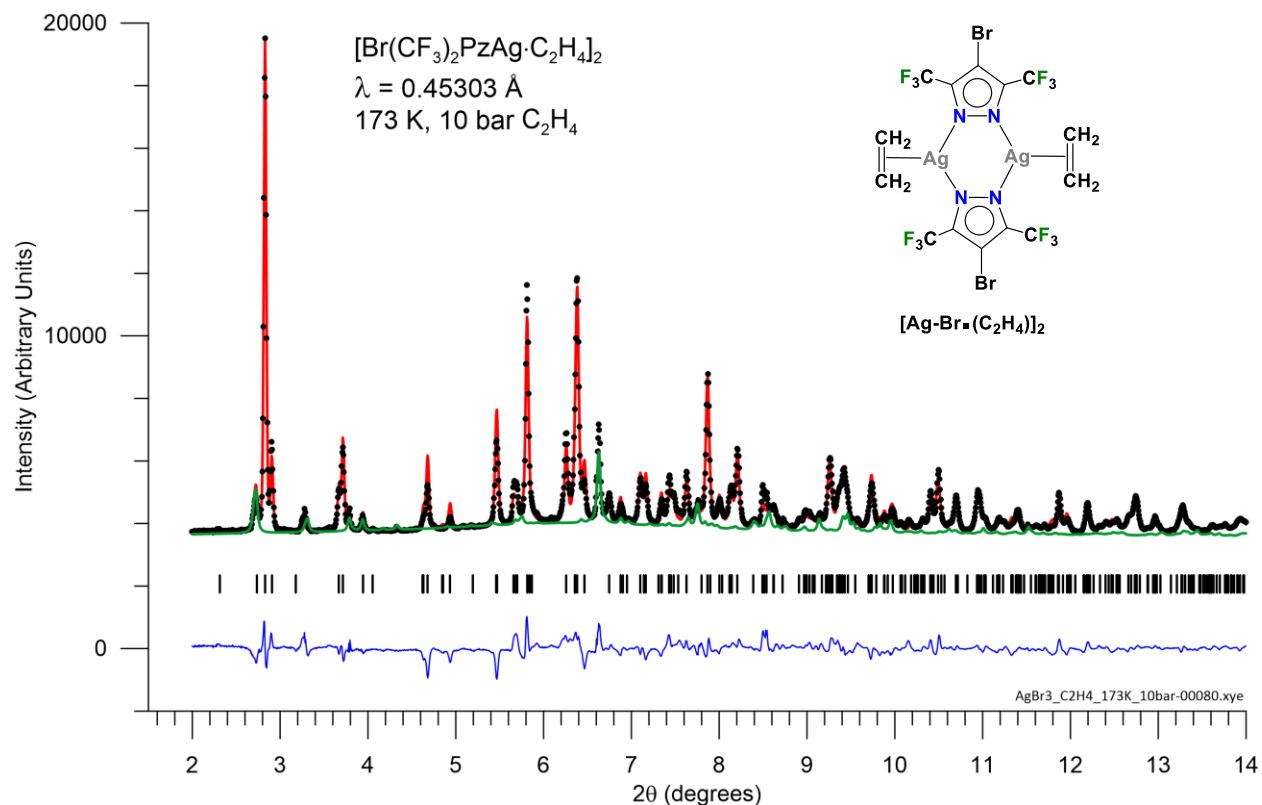

**Figure S29.** Rietveld of  $[\text{Ag-Br}\bullet(\text{C}_2\text{H}_4)]_2$ . Reaction is incomplete with  $\sim 15\%$   $[\text{Ag-Br}]_3$  starting material left as shown in green trace. This is the last (top) scan of contour plot of  $[\text{Ag-Br}]_3 \rightarrow [\text{Ag-Br}\bullet(\text{C}_2\text{H}_4)]_2$  in Figure S26. CCDC deposition 2267047.

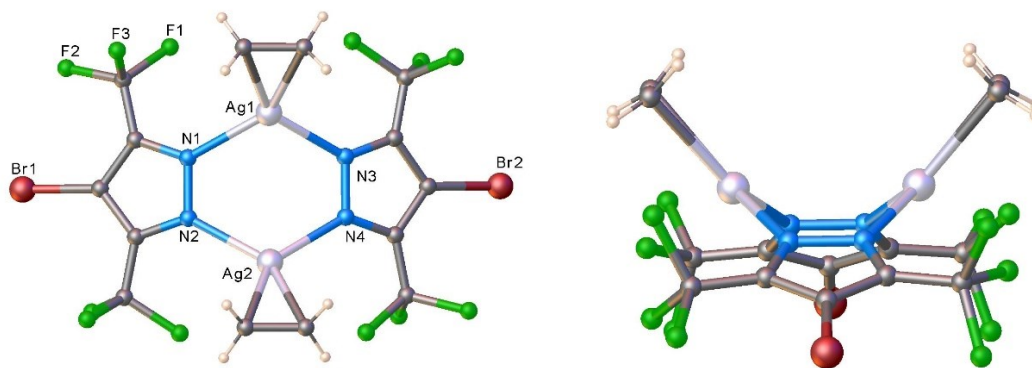

**Figure S30.** Two views of molecular structure of  $[\text{Ag-Br}\bullet(\text{C}_2\text{H}_4)]_2$  based on above in situ powder X-ray diffraction data.

## Computational studies and results

All calculations were carried out by using relativistic DFT methods employing the ADF code<sup>[14]</sup> with the all-electron triple- $\zeta$  Slater basis set plus the double-polarization (STO-TZ2P) basis set in conjunction with the Becke-Perdew (BP86) functional<sup>[15]</sup> within the generalized gradient approximation (GGA). London dispersion corrections were taken into account via the pair-wise Grimme3 approach.<sup>[16]</sup> Such level of theory is denoted as TZ2P/BP86-D3. Geometry optimizations were performed without any symmetry restrain, via the analytical energy gradient method implemented by Versluis and Ziegler,<sup>[17]</sup> with energy convergence criteria set at  $10^{-4}$  Hartree, gradient convergence criteria at  $10^{-4}$  Hartree/Å and radial convergence of  $10^{-3}$  Å. Thermodynamic properties were obtained from vibrational analysis. Scalar relativistic effects were considered through the ZORA Hamiltonian.<sup>[17]</sup>

The interaction energy is further dissected into several chemically meaningful terms according to the Energy Decomposition Analysis (EDA) of Ziegler and Rauk,<sup>[18]</sup>

$$\Delta E_{\text{int}} = \Delta E_{\text{Pauli}} + \Delta E_{\text{elstat}} + \Delta E_{\text{orb}} + \Delta E_{\text{disp}}$$

where  $\Delta E_{\text{Pauli}}$  term involves the electron repulsion between occupied orbitals from the different fragments.  $\Delta E_{\text{elstat}}$  and  $\Delta E_{\text{orb}}$  are related to the stabilizing electrostatic and covalent character of the interaction, respectively. The contribution from dispersion interaction ( $\Delta E_{\text{disp}}$ ) is evaluated using the pairwise correction of Grimme (D3).

**Table S8.** Difference in energy between planar and puckered Ag<sub>3</sub>N<sub>6</sub> conformation of [Ag-H]<sub>3</sub>, [Ag-Br]<sub>3</sub>, and [Ag-CF<sub>3</sub>]<sub>3</sub>, in the absence of ethylene. Values given in kcal/mol.

|                                    |       |
|------------------------------------|-------|
| [Ag-CF <sub>3</sub> ] <sub>3</sub> | 46.31 |
| [Ag-Br] <sub>3</sub>               | 49.44 |
| [Ag-H] <sub>3</sub>                | 50.52 |

**Table S9.** Interaction energy for the Ag<sub>2</sub>N<sub>4</sub>-AgN<sub>2</sub> interaction and related energy decomposition analysis at intermediate **2** structures (see Figure S31), in order to account for the release of a AgN<sub>2</sub> unit.

|                      | [Ag-CF <sub>3</sub> ] <sub>3</sub> |       | [Ag-Br] <sub>3</sub> |       | [Ag-H] <sub>3</sub> |       |
|----------------------|------------------------------------|-------|----------------------|-------|---------------------|-------|
| ΔE <sub>Pauli</sub>  | 116.1                              |       | 115.6                |       | 137.2               |       |
| ΔE <sub>EIstat</sub> | -110.1                             | 61.0% | -107.4               | 59.4% | -137.1              | 62.0% |
| ΔE <sub>Orb</sub>    | -42.4                              | 23.5% | -45.1                | 24.9% | -56.6               | 25.6% |
| ΔE <sub>Disp</sub>   | -28.0                              | 15.5% | -28.3                | 15.7% | -27.4               | 12.4% |
|                      |                                    |       |                      |       |                     |       |
| ΔE <sub>Int</sub>    | -64.3                              |       | -65.2                |       | -83.8               |       |

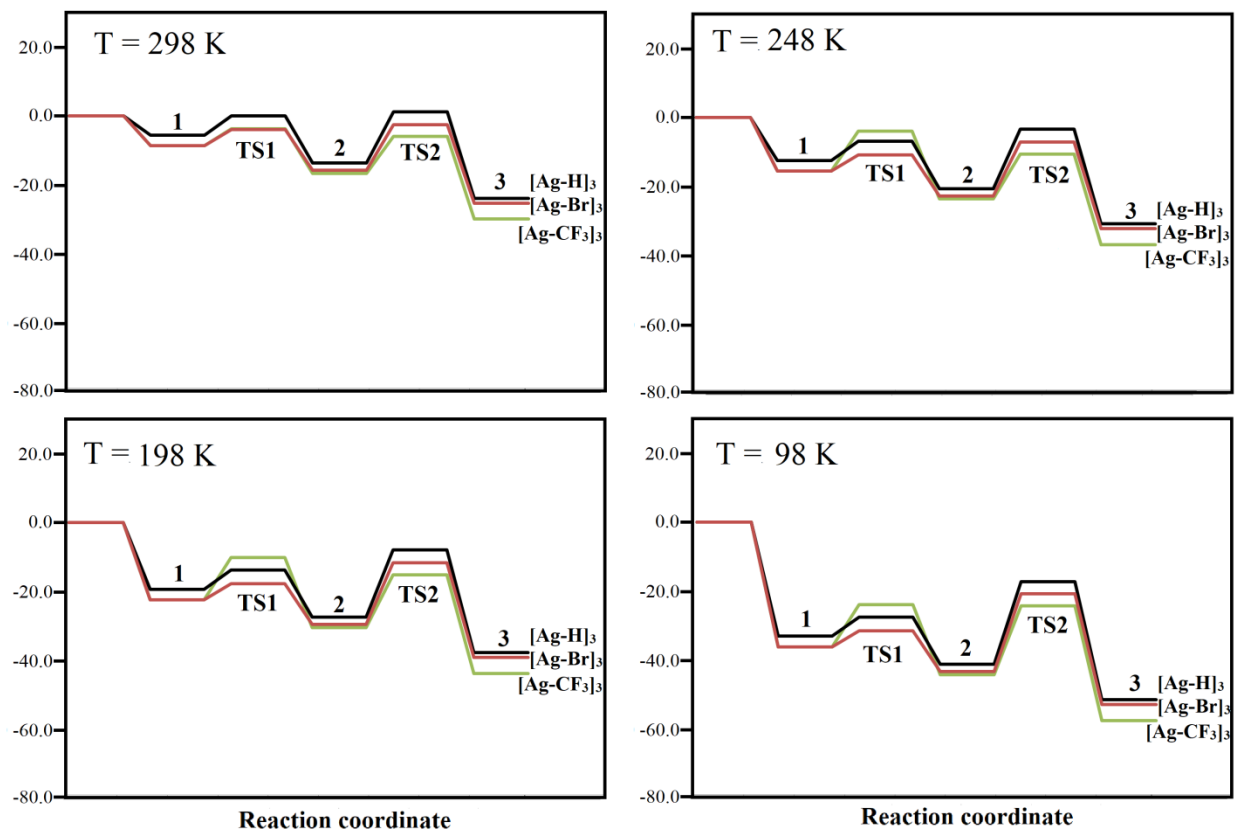

**Figure S31.** Graphical representation of Gibbs free energy difference for reaction coordinates at different temperatures. Values in kcal/mol, see Table S9.

**Table S10.** Gibbs free energy difference for reaction coordinates at different temperatures. Values in kcal/mol.

| <b>T = 298 K</b>                   | <b>1</b> | <b>TS1</b> | <b>2</b> | <b>TS2</b> | <b>3</b> |
|------------------------------------|----------|------------|----------|------------|----------|
| [Ag-CF <sub>3</sub> ] <sub>3</sub> | -8.7     | -3.7       | -16.8    | -6.0       | -30.1    |
| [Ag-Br] <sub>3</sub>               | -8.7     | -4.0       | -15.9    | -2.5       | -25.5    |
| [Ag-H] <sub>3</sub>                | -5.6     | 0.0        | -13.7    | 1.2        | -24.1    |
|                                    |          |            |          |            |          |
| <b>T = 248 K</b>                   |          |            |          |            |          |
| [Ag-CF <sub>3</sub> ] <sub>3</sub> | -15.6    | -3.9       | -23.7    | -10.6      | -37.1    |
| [Ag-Br] <sub>3</sub>               | -15.6    | -10.9      | -22.8    | -7.1       | -32.4    |
| [Ag-H] <sub>3</sub>                | -12.5    | -6.9       | -20.7    | -3.4       | -31.0    |
|                                    |          |            |          |            |          |
| <b>T = 198 K</b>                   |          |            |          |            |          |
| [Ag-CF <sub>3</sub> ] <sub>3</sub> | -22.5    | -10.2      | -30.6    | -15.2      | -44.0    |
| [Ag-Br] <sub>3</sub>               | -22.5    | -17.8      | -29.7    | -11.7      | -39.3    |
| [Ag-H] <sub>3</sub>                | -19.4    | -13.8      | -27.6    | -8.0       | -37.9    |
|                                    |          |            |          |            |          |
| <b>T = 98 K</b>                    |          |            |          |            |          |
| [Ag-CF <sub>3</sub> ] <sub>3</sub> | -36.3    | -24.0      | -44.4    | -24.4      | -57.8    |
| [Ag-Br] <sub>3</sub>               | -36.3    | -31.7      | -43.5    | -20.9      | -53.1    |
| [Ag-H] <sub>3</sub>                | -33.2    | -27.7      | -41.4    | -17.3      | -51.7    |
|                                    |          |            |          |            |          |



## References:

- [1] E. Y. Slobodyanyuk, O. S. Artamonov, O. V. Shishkin, P. K. Mykhailiuk, *Eur. J. Org. Chem.* **2014**, 2014, 2487-2495.
- [2] L. Krause, R. Herbst-Irmer, G. M. Sheldrick, D. Stalke, *J. Appl. Crystallogr.* **2015**, 48, 3-10.
- [3] G. M. Sheldrick, *Acta Crystallogr. A, Found. Adv.* **2015**, 71, 3-8.
- [4] G. M. Sheldrick, *Acta Crystallogr. C, Struct. Chem.* **2015**, 71, 3-8.
- [5] O. V. Dolomanov, L. J. Bourhis, R. J. Gildea, J. A. K. Howard, H. Puschmann, *J. Appl. Crystallogr.* **2009**, 42, 339-341.
- [6] P. J. Chupas, K. W. Chapman, C. Kurtz, J. C. Hanson, P. L. Lee, C. P. Grey, *J. Appl. Crystallogr.* **2008**, 41, 822-824.
- [7] D. Parasar, A. H. Elashkar, A. A. Yakovenko, N. B. Jayaratna, B. L. Edwards, S. G. Telfer, H. V. R. Dias, M. G. Cowan, *Angewandte Chemie, International Edition* **2020**, 59, 21001-21006.
- [8] B. H. Toby, R. B. Von Dreele, *J. Appl. Crystallogr.* **2013**, 46, 544-549.
- [9] A. Hammersley, S. Svensson, M. Hanfland, A. Fitch, D. Hausermann, *High Press. Res.* **1996**, 14, 235-248.
- [10] A. A. Coelho, Topas Version 7 Technical Reference, **2020**. <http://www.topas-academic.net>
- [11] M. A. Omary, M. A. Rawashdeh-Omary, M. W. A. Gonser, O. Elbjeirami, T. Grimes, T. R. Cundari, H. V. K. Diyabalanage, C. S. P. Gamage, H. V. R. Dias, *Inorg. Chem.* **2005**, 44, 8200-8210.
- [12] H. V. R. Dias, S. A. Polach, Z. Wang, *J. Fluor. Chem.* **2000**, 103, 163-169.
- [13] C. V. Hettiarachchi, M. A. Rawashdeh-Omary, D. Korir, J. Kohistani, M. Yousufuddin, H. V. R. Dias, *Inorg. Chem.* **2013**, 52, 13576-13583.
- [14] S. ADF 2019, Theoretical Chemistry, Vrije Universiteit, Amsterdam, The Netherlands, p. <http://www.scm.com>.
- [15] A. D. Becke, *Phys. Rev. A* **1988**, 38, 3098-3100.
- [16] S. Grimme, *WIREs Computational Molecular Science* **2011**, 1, 211-228.
- [17] L. Versluis, T. Ziegler, *J. Chem. Phys.* **1988**, 88, 322-328.
- [18] T. Ziegler, A. Rauk, *Inorg. Chem.* **1979**, 18, 1558-1565.
